# Supplementary material
Source: PubMed Central journal article supplement (PMC4246943)
Supplement: pnas.1408710111.sapp.pdf [file pnas.1408710111.sapp.pdf]

Supporting Information for  
**Local anesthetic and anti-epileptic drug access and binding  
to a bacterial voltage-gated sodium channel.**

Céline Boiteux, Igor Vorobyov, Robert J. French, Christopher French,  
Vladimir Yarov-Yarovoy and Toby W. Allen

## Supporting Methods

### *Full simulation detail:*

The Na<sub>v</sub>Ab protein (residues 1 to 221, x-ray crystallographic coordinates from pdb 3RVY (1)) was embedded in a bilayer of 336 (167 top and 169 bottom) dipalmitoylphosphatidylcholine (DPPC) lipids (the best studied lipid bilayer in Molecular Dynamics (MD) simulations (2)), with explicit water molecules (~20,000 molecules), 150 mM of NaCl and a high concentrations of benzocaine (BZC; Fig.S4a) or phenytoin (PHT; Fig.S4b), as described below, to form 2 simulation boxes of 125x125x76 Å containing 117,821 or 118,904 atoms respectively. Residue C217 was mutated back to the original isoleucine in all four monomers.

In order to enhance partitioning and sampling of binding sites by the drugs on the MD timescale, an initial bulk concentration of 500 mM was first tested for both drugs. At such a concentration, PHT displayed a tendency for aggregation in water, leading to a reduction to 75 mM. In both systems, rapid partitioning of the drugs into the membrane interface was observed, bringing the concentrations of the drugs in solution down to 5-10 mM after ~0.2 μs of simulation, as shown in Fig.S4c. This is the bulk drug concentration in equilibrium with the channel-membrane system, and is still considered to be high (recommended plasma concentration is 40 to 80 μM for PHT (3), and toxicity has been documented for concentrations as low as 9 μM BZC (4)), but necessary for unbiased exploration of binding on the multi-μs timescale.

All systems were built and pre-equilibrated with the CHARMM program (5, 6), using the C36 lipid (2) and C22 protein parameters (7) with CMAP corrections (8), TIP3P water (9), modified ion parameters (described below) and newly parameterized BZC and PHT (see *Drugs Parameterization* section below). After 1000 (4x250) steps of steepest descent minimization, MD simulations commenced with a timestep of 1 fs and initial harmonic restraints (10 kcal/mol/Å<sup>2</sup>) applied to all heavy atoms. These restraints were slowly released over 2.5 ns, followed by 5 ns of simulation without any restraints, using a timestep of 2 fs. The systems were then equilibrated for an additional 100 ns using NAMD (version 2.9) (10) and the same force field. All simulations were performed at constant pressure (1 atm) (11, 12), with fixed lateral area (125.4x125.4 Å<sup>2</sup>) in order to maintain the correct area per lipid obtained from CHARMM equilibration) and constant temperature of 323K (chosen to avoid the gel phase transition of DPPC lipids), using a Nosé-Hoover thermostat (13, 14). All bonds to H atoms were maintained using the SHAKE algorithm (15). Electrostatic interactions were computed using Particle Mesh Ewald (16), with grid spacing of 1 Å and 6<sup>th</sup> order B-spline for mesh interpolation. Non-bonded pair lists were updated every 20 steps with a cutoff distance of 15 Å and a real space cutoff of 12 Å with energy switch (switching distance of 10 Å).

Anton software version 2.12.1 from D. E. Shaw Research was used for production runs using the purpose-built Anton supercomputer (17). These simulations were carried out using tetragonal

periodic boundary conditions in the NPT ensemble at 323 K, a 2 fs time step with non-bonded long-range interactions computed every 6 fs using the RESPA multiple time step algorithm (18). The multi-integrator (multigrator) algorithm (19) developed in-house by D. E. Shaw Research was used for temperature and semi-isotropic pressure coupling whereas their Gaussian split Ewald (GSE) method (20) was used for handling long-range electrostatic interactions with Gaussian RMS width parameters  $\sigma$  and  $\sigma_s$  (used for Ewald splitting and charge spreading onto the grid/force interpolation from the grid, respectively), the grid size and spreading radius optimized for each simulation using guesser scripts for an initial structure. For BZC and PHT system production runs, 12.36 and 12.32 Å non-bonded interaction cutoffs were used, optimized by Anton simulation scripts for these systems. Non-bonded interaction tapering (switching or shifting) was not used, as it was not available on Anton. A long-range Lennard-Jones (LJ) correction (beyond cutoff) was not used for those systems either as was suggested for C36 lipid force field (2). A detailed description of the simulation methodology employed in this study can be found at: [http://www.deshawresearch.com/downloads/download\\_desmond.cgi/Desmond\\_Users\\_Guide-0.5.3.pdf](http://www.deshawresearch.com/downloads/download_desmond.cgi/Desmond_Users_Guide-0.5.3.pdf).

Modified LJ parameters were used to describe the interactions between  $\text{Na}^+$  and carbonyl oxygens of residues 175-178 to reproduce their correct free energies of solvation in a protein backbone mimetic, N-methylacetamide (21-23). In Anton production runs modified Lennard-Jones parameters for interactions between  $\text{Na}^+$  and aspartate/glutamate carboxyl oxygen atoms, phosphate and carbonyl lipid oxygen atoms were used as was suggested in a recent study (24) to prevent ion overbinding and provide good agreement with experimental osmotic pressure data for aqueous salt solutions as well as electrophoresis data for lipid vesicles. In addition, in production runs, modified  $\text{Na}^+$  Lennard-Jones parameters (25) were used for other  $\text{Na}^+$  interactions, in order to correctly reproduce experimental free energy difference between bulk aqueous solvation of  $\text{Na}^+$  and  $\text{K}^+$ . Standard CHARMM LJ parameters for  $\text{Cl}^-$  were used (26).

The  $\text{Na}_v\text{Ab}/\text{PHT}$  production simulation ran for 2,843 ns following on from the NAMD equilibrated structure (after 47 ns) totaling 2.9  $\mu\text{s}$  with trajectory frames saved every 0.12 ns. For  $\text{Na}_v\text{Ab}/\text{BZC}$ , ~150 ns of equilibration with NAMD, were extended by a further 301 ns using Anton without latest LJ modification for  $\text{Na}^+$  interactions (except for ones with carbonyl oxygen for  $\text{Na}_v\text{Ab}$  selectivity filter residues as described below) and then followed by a 1,404 ns production run with all the LJ modifications included, thus totaling ~ 1.9  $\mu\text{s}$  of simulation. Trajectory frames were saved every 0.12 ns as for the  $\text{Na}_v\text{Ab}/\text{PHT}$  simulation.

#### *Simulations for membrane partitioning:*

Simulations of membrane partitioning were performed with dimyristoylphosphatidylcholine (DMPC) bilayers in 0.15 M aqueous NaCl solution at 313 K, chosen to ensure a liquid crystalline phase at the same temperature used experimentally for BZC (27). The systems were simulated with tetragonal periodic boundary conditions (PBC), with 128 lipids, 5870 waters, 15  $\text{Na}^+$  and 15  $\text{Cl}^-$ , one drug molecule, with 32,767 or 32,775 atoms in total for BZC or PHT respectively, built using standard procedures as described previously (28).

Umbrella Sampling (29) (US) for BZC and PHT membrane partitioning involved 61 independent simulations (windows) with 1 Å resolution, i.e. from -30 to 30 Å, with the drug center of mass (COM) held with respect to membrane COM near each US window position by a 2.5 kcal/mol/Å<sup>2</sup> force constant. The lateral distance of BZC or PHT from the z axis as well as the lipid bilayer COM

along the  $z$  axis were constrained using cylindrical and planar constraints of  $5 \text{ kcal/mol/\AA}^2$  to prevent drifting and thus assist simulation analysis without affecting free energy profiles. Potentials of mean force (PMF) were calculated using weighted histogram analysis method (WHAM) (30). All US simulations were performed in the  $NPT$  ensemble at a constant pressure of 1 atm using the Langevin piston barostat (12), and constant temperature of 313K using a Nosé-Hoover thermostat(13, 14). All bonds to hydrogen atoms were maintained using the SHAKE algorithm (15) allowing to use a timestep of 2 fs. Electrostatic interactions were computed using Particle Mesh Ewald (16), with grid spacing of  $1 \text{ \AA}$  and 6<sup>th</sup> order B-spline for mesh interpolation. Non-bonded pair lists were kept up to  $16 \text{ \AA}$  and updated heuristically. And a real space non-bonded cutoff distance of  $12 \text{ \AA}$  was used with atom-based force switch algorithm starting at  $8 \text{ \AA}$ .

For BZC we ran between 11.3 and 17.3 ns per window (16.6 ns on average), while for PHT we ran between 11.5 and 18 ns per window (15.4 ns on average), but extended to 25ns for the central windows ( $z = -2$  to  $z = 2 \text{ \AA}$ ) to ensure convergence. Simulations were run using the CHARMM program (5, 6) and CHARMM36 parameters for lipids (2). Based on PMF convergence (Fig.S2c&d) for each US window we discarded the first 5 ns for BZC and 7 ns for PHT simulations. Symmetrized PMF results are shown in Fig.S2a, compared with similar results from unbiased simulations (where drugs were in the membrane and away from the protein) in Fig.S2b.

#### *Membrane Partitioning:*

PMFs for BZC and PHT are shown in Fig.S2. The PMF minima are  $-3.3 \pm 0.4 \text{ kcal/mol}$  at  $|z| \sim 8.6 \pm 0.1 \text{ \AA}$  for BZC and  $-4.13 \pm 0.09 \text{ kcal/mol}$  at  $|z| \sim 9.59 \pm 0.03 \text{ \AA}$  for PHT. At the membrane center, PHT encounters a barrier of  $0.66 \pm 0.07 \text{ kcal/mol}$  (with respect to bulk aqueous solution) and BZC a plateau of  $-0.6 \pm 0.1 \text{ kcal/mol}$ . Partition coefficients were calculated as (31):

$$P_x = \frac{1}{(z_2 - z_1)} \int_{z_1}^{z_2} e^{-\frac{\{W(z) - W(z_1)\}}{k_B T}} dz$$

where  $W(z)$  is the PMF,  $z_1$  and  $z_2$  are points in aqueous solution on opposite sides of the membrane,  $k_B$  is Boltzmann constant, and  $T$  is the absolute temperature. Partitioning free energies were calculated as  $\Delta G_x = -k_B T \ln P_x$ . Error bars were estimated from PMFs by propagation of errors. Calculated partitioning coefficients (and free energies) are  $P_b = 38.7 \pm 6.3$  ( $\Delta G_b = -2.28 \pm 0.10 \text{ kcal/mol}$ ) and  $P_p = 139 \pm 25$  ( $\Delta G_p = -3.07 \pm 0.11 \text{ kcal/mol}$ ) for BZC and PHT, respectively. The experimental values for  $P_b$  in DMPC from two different studies are  $202 \pm 6$  (27) at 313 K and  $\sim 186$  (32) at 310 K, being several times greater, but with a difference in  $\Delta G_b$  of only  $\sim 1 \text{ kcal/mol}$ . This suggests weaker partitioning into the membrane with our model, which might be due to differences between simulations and experimental setup or possibly a slightly overestimated dipole moment (Table SA4, Appendix SA1), but within acceptable energetic differences. Interestingly, the gas-phase dipole in our model (3.13 D) is only marginally larger than QM MP2 one (3.02 D), though can typically be  $\sim 20\%$  larger to get right condensed phase properties (7, 33). Moreover, BZC interaction energies with water are in good agreement with scaled QM values (Table SA6). There is a similar discrepancy between PHT calculated ( $139 \pm 25$ ) and experimental ( $657 \pm 33$ ) (34) values, although quantitative comparison in this case might be problematic as the experiments were done using a different membrane (egg phosphatidylcholine) and temperature (298 K).

### *Bulk Solvent Free Energy Perturbation calculations:*

Partitioning free energies of BZC and PHT between TIP3P water, and hexane (Hex) or cyclohexane (cHex) were calculated by the free energy perturbation (FEP) approach (35, 36), using the CHARMM27 force field with new parameters for BZC and PHT. Water-Hex and water-cHex partitioning free energies were calculated as a difference in Hex or cHex and water solvation free energies. Electrostatic and dispersive contributions were computed using the standard linear coupling scheme (with a coupling parameter ranging from 0 to 1 in increments of 0.1), whereas the repulsive term was transformed into a soft-core potential and calculated in multiple stages (for staging parameter values of 0, 0.2, 0.3, 0.4, 0.5, 0.6, 0.7, 0.8, 0.9 and 1.0), as described previously (36). Systems of 424 Hex/cHex or 2704 water molecules were placed in cubic boxes with BZC or PHT in the center constrained by a weak ( $0.5 \text{ kcal/mol/\AA}^2$ ) harmonic restraint acting on a solute center of mass. All systems used for FEP calculations were first subjected to initial 200 step steepest descent minimization (to eliminate bad contacts) and then 6 ns of MD equilibration. For each system 3 FEP simulations were performed starting from different equilibrated structures using 40 independent 600 ps runs for each value of a coupling or staging parameter with the 1<sup>st</sup> 100 ps of each run treated as equilibration (thus totaling 20 ns of production runs per simulation). All equilibration and FEP MD simulations were performed in the *NPT* ensemble at a constant pressure of 1 atm using the Langevin piston barostat (12), a constant temperature of 298K using a Nosé-Hoover thermostat (13, 14), PME for electrostatics (16), and cubic periodic boundary conditions.

Calculated free energies were corrected for finite LJ cutoffs in FEP simulations using average differences in interaction energies between a solute and a solvent from a number of atomic coordinate sets from the FEP simulations. Interaction energies were computed using non-bond cutoffs used in the FEP simulations (LJ energy switch from 10 to 12 Å and no long range correction) as reference values and were compared to those computed with the long-range (LR) cutoff (LJ energy switch from 30 to 32 Å along with the long-range LJ correction) and those computed with the same cutoffs as used in MD membrane partition simulations (force switch from 8 to 12 and no long range correction, as suggested for use with the C36 lipid force field (2)). The partitioning free energy values corrected in such a way were labeled FEP (LR) and FEP (raw), respectively (see Table S1).

The calculated water-Hex and water-cHex partitioning free energies for BZC with long-range LJ corrections are  $-0.01 \pm 0.17 \text{ kcal/mol}$  and  $-0.57 \pm 0.23 \text{ kcal/mol}$ , in agreement within the error with experimental values ( $-0.26 \pm 0.25 \text{ kcal/mol}$  (37) and  $-0.38 \pm 0.01 \text{ kcal/mol}$  (27) for Hex and cHex, respectively). The calculated water-Hex for PHT is  $0.23 \pm 0.19 \text{ kcal/mol}$ , also in agreement with an experimental value ( $0.41$  (38)) (see Table S1). No experimental data were found for PHT water-cHex partitioning. The use of the same LJ cutoffs used in membrane partitioning simulations results in a slightly larger difference with experimental data (compare FEP (raw) and experimental values in Table S1), although still within the reported errors.

### *Drug Transition rates through the membrane:*

We used Kramer's transition rate theory to compute the transition rates of the drugs through the DMPC lipid bilayer, using trajectories obtained during US calculations. It can be shown that this rate can be approximated by the expression (39, 40):

$$k = \frac{D(z_{\text{barrier}})}{2\pi kT} \left[ -W''(z_{\text{barrier}}) W''(z_{\text{well}}) \right]^{1/2} e^{-\Delta W_{\text{barrier}}/kT}$$

where  $D(z_{\text{barrier}})$  is the diffusion constant measured near the top of the barrier in the *z*-direction,  $W''(z)$  the second derivative of the PMF estimated at the barrier and wells by least squares harmonic fits, and  $\Delta W_{\text{barrier}}$  is the barrier height for the transition through the membrane. For BZC,  $\Delta W_{\text{barrier}} =$

2.66±0.45 kcal/mol, we estimated the curvatures of the wells at the lipid interface and of the barrier at the bilayer center to be 0.088±0.026 and -0.013±0.020 kcal/mol/Å<sup>2</sup>, respectively. For PHT  $\Delta W_{barrier} = 4.80 \pm 0.12$  kcal/mol, with wells and barriers having curvatures 0.084±0.007 and -0.16 ± 0.09 kcal/mol/Å<sup>2</sup>, respectively.

To estimate the 1D diffusion constant in the z direction near the barrier ( $z \sim 0$ ),  $D(z_{barrier})$ , we analyzed the corresponding central US windows with Hummer's method (41):

$$D(z_i) = \frac{\langle \delta z^2 \rangle_i}{\tau_i}$$

where  $\langle \delta z^2 \rangle_i$  is the mean square deviation from the average position in US window  $i$ , and  $\tau_i$  is the position correlation time for umbrella sampling window  $i$ :

$$\tau_i = \lim_{s \rightarrow 0} \tau_i(s) = \lim_{s \rightarrow 0} \frac{\hat{C}_z(s; z_i)}{\langle \delta z^2 \rangle_i} = \lim_{s \rightarrow 0} \frac{\int_0^\infty e^{-st} \langle \delta z(t) \delta z(0) \rangle_i dt}{\langle \delta z^2 \rangle_i}$$

$\hat{C}_z(s; z_i)$  is the Laplace transform of the position autocorrelation function  $C_z(t; z_i)$ :

$$\hat{C}_z(s; z_i) = \int_0^\infty e^{-st} C_z(t; z_i) dt$$

where  $C_z(t; z_i) = \langle \delta z(t) \delta z(0) \rangle_i$ ,  $s$  is inverse time and  $\delta z = z - \langle z \rangle_i$  is the drug COM displacement.

Values of  $\tau_i(s)$  were calculated at  $s$  values 0.01, 0.02, ..., 0.1, 0.2, ..., 1.0, 2.0, ..., 10.0 ps<sup>-1</sup>.  $\tau_i(s)$  were extrapolated to  $s=0$  by fitting the function  $a/(s+b)$ , where  $a$  and  $b$  are parameters, in the  $s$  range from 0.02 to 1.00 ps<sup>-1</sup>. See our previous study (42) for more details.

The value of the diffusion constant close to the barrier in the z-direction was determined to be 0.015 and 0.0027 Å<sup>2</sup>/ps for  $z = -0.12 \pm 0.18$  Å and  $-0.11 \pm 0.40$  Å, for BZC and PHT, respectively (Fig.S2d). The estimated transition rates through the membrane are 1.77±0.50 μs<sup>-1</sup> for BZC and 35±3 ms<sup>-1</sup> for PHT, explaining significantly less events with PHT in the middle of the membrane.

#### Drug parameterization:

BZC and PHT topology and parameters are not available in CHARMM biomolecular (7) or generalized (CGENFF) (33) force fields (although interfacial lipid interactions of BZC have been studied with GROMACS and QM/MM (43, 44)) and were developed *de novo* using the following methodology, strictly following CHARMM force field standards. Initial guesses for partial atomic charges and other force field parameters for these molecules were obtained using CGENFF program (45, 46) version 0.9.7 beta available at <https://www.paramchem.org/>. Molecular structures in mol2 format from the ZINC database (47) (ZINC12358719 for BZC and ZINC02510358 for PHT) were used to generate topology and parameters for CGENFF program. For both drugs we only considered neutral forms that predominate at physiological conditions ( $pK_a=2.51$  for BZC  $NH_3^+/NH_2$  equilibrium (48) and  $pK_a=8.06-8.33$  or PHT  $NH/N^-$  equilibrium (49, 50)). There is also lactam/lactim (imide/imine) tautomerism for PHT with di-lactam, two lactam-lactim and di-lactim tautomers possible (Appendix SA1). Our QM calculations at HF/6-31G(d) and MP2/6-31G(d) levels in both gas phase and in implicit solvents of different polarity indicate that the di-lactam form is dominant in all cases (>10 kcal/mol lower in energy; Table SA1 in Appendix SA1) consistent with related compounds (50). Consequently, neutral di-lactam PHT and BZC structures were used.

After generating initial topology and parameters for BZC and PHT, we performed validation and optimization using QM as target data, following the suggested CGENFF force field methodology (33). Parameter optimization and validation was focused on initial force field parameters, which were not present in CGENFF and were obtained from existing parameters with high penalty scores (i.e. where chemical analogy was poor) (46). MP2/6-31G(d) molecular dipole magnitude and orientation (Tables SA4 and SA5, Appendix SA1) as well as scaled HF/6-31G(d) orientations with water (Tables SA6 and SA7, Appendix SA1) were used for partial atomic charge optimization (Tables SA2 and SA3, Appendix SA1) for compatibility with biomolecular CHARMM force field (7). The gas-phase MP2/6-31G(d) dipole, along with HF/6-31G(d) interaction energies, have to be overestimated by CHARMM (ideally by ~16%) to account for polarization in aqueous media (7, 33). For PHT we found the CHARMM dipole moment increased by ~17% compared to the QM value (Table SA5, Appendix SA1) and interaction energies with water were in good agreement with 1.16 scaled QM values (Table SA7, Appendix SA1). For BZC, the CHARMM dipole moment was only ~4% larger than the QM value (Table SA4, Appendix SA1). A further increase in CHARMM dipole moment by partial charge modification resulted in poor agreement for BZC-water interactions and was not pursued further. Internal bond and angle parameters were validated or modified based on comparison of MP2/6-31G(d) and CHARMM optimized geometries (see Tables SA8 and SA9, Appendix SA1) and scaled vibrational frequencies (Table SA10 for BZC, not performed for PHT). For bond lengths and angles, 0.01 Å and 1° differences between QM and CHARMM values were sought (see Tables SA8 and SA9, Appendix SA1). Dihedral angle parameters were fitted to reproduce MP2/6-31G(d) potential energy surfaces for rotation around a particular bond (see Figures SA1 and SA2, Appendix SA1). Parameter optimization was iterated several times until a satisfactory agreement between QM and CHARMM data was obtained. A substantial improvement over the CGENFF parameters (in terms of better agreement between CHARMM and QM geometries, vibrational frequencies, and interactions with water) was achieved. Final topology and parameters for BZC and PHT are provided in appendices SA2 and SA3 as stream files for the CHARMM program.

*Dissociation constant calculations for channel binding:*

For each binding site, the dissociation constant was calculated from the equilibrium PMF  $W(\mathbf{r})$ :

$$K_d^{-1} = N_A \int_{site} \frac{e^{-W(\mathbf{r})/kT}}{e^{-W(\mathbf{r}_0)/kT}} d\mathbf{r}$$

where  $\mathbf{r}_0$  is a bulk reference. This quantity can also be expressed in terms of the unbiased 2D PMFs:

$$K_d^{-1} = N_A \Delta z \frac{e^{-W(x_m, y_m)/kT}}{e^{-W(x_0, y_0)/kT}} \iint_{site} \frac{e^{-W(x, y)/kT}}{e^{-W(x_m, y_m)/kT}} dx dy$$

where  $W(x_m, y_m)$  is the free energy at a reference position in the membrane, and  $\Delta z$  is the thickness of the slab along z-axis used for calculation of the 2D PMFs projected on the x- and y-axis. As a consequence of the high affinity of the drugs for the membrane, the 2D PMFs show poor sampling of the transition from solvent to membrane, and do not allow for direct comparison with a reference position in the solvent. To overcome this, the dissociation constant was first obtained relative to the membrane interface (at  $z = 9$  and  $10$  Å for BZC and PHT respectively), and converted to be relative

to solvent using the full sampling provided by the US membrane partitioning calculations, as included in the above expression. Results for each binding site are summarized in Tables S2 and S3 for BZC and PHT, respectively.

## Supporting Tables

**Table S1:** Partitioning free energies of BZC and PHT in hexane (Hex) and cyclohexane (cHex) calculated experimentally<sup>a</sup> and by free energy perturbations with (LR)<sup>c</sup> and without (raw)<sup>b</sup> long-range Lennard-Jones corrections. <sup>d</sup>From reference (37). <sup>e</sup>From reference (27). <sup>f</sup>From reference (38). All values are in kcal/mol and errors in calculated free energies are standard deviations calculated from 3 independent simulations.

| <i>Method</i>                   | <i>Water → Hex</i> | <i>Water → cHex</i> |
|---------------------------------|--------------------|---------------------|
| <b><i>Benzocaine</i></b>        |                    |                     |
| <i>Experimental<sup>a</sup></i> | $-0.26 \pm 0.25^d$ | $-0.38 \pm 0.01^e$  |
| <i>FEP (raw)<sup>b</sup></i>    | $0.20 \pm 0.17$    | $0.00 \pm 0.23$     |
| <i>FEP (LR)<sup>c</sup></i>     | $-0.01 \pm 0.17$   | $-0.57 \pm 0.23$    |
| <b><i>Phenytoin</i></b>         |                    |                     |
| <i>Experimental<sup>a</sup></i> | $0.41^f$           | N/A                 |
| <i>FEP (raw)<sup>b</sup></i>    | $0.57 \pm 0.19$    | $0.12 \pm 0.19$     |
| <i>FEP (LR)<sup>c</sup></i>     | $0.23 \pm 0.19$    | $-0.75 \pm 0.19$    |

**Table S2:** BZC binding sites. The <sup>+</sup> sign following the segment name in brackets indicates that the residue belongs to the next subunit.

| <i>Binding site</i>  | <i>Location</i>                   | <i>Residues (Segment)</i>                                   | <i>Interactions</i>    | <i>K<sub>d</sub> (μM)</i> |
|----------------------|-----------------------------------|-------------------------------------------------------------|------------------------|---------------------------|
| <i>A<sub>b</sub></i> | <i>Fenestrations (S5-S6)</i>      | <i>F203 (S6)</i>                                            | <i>π-stacking</i>      | <i>141±28</i>             |
| <i>B<sub>b</sub></i> | <i>Gate (S6)</i>                  | <i>V213-I217 (S6, 4 subunits)</i>                           | <i>Hydrophobic</i>     | <i>407±54</i>             |
| <i>C<sub>b</sub></i> | <i>P-loop, between 2 subunits</i> | <i>F167&amp;Y168(P1)-W195(S6<sup>+</sup>)</i>               | <i>π-stacking</i>      | <i>460±62</i>             |
| <i>D<sub>b</sub></i> | <i>High interface VSD – S5</i>    | <i>F37(S1-S2)-Y142(S5<sup>+</sup>)-F167(P1<sup>+</sup>)</i> | <i>π-stacking</i>      | <i>811±77</i>             |
| <i>E<sub>b</sub></i> | <i>P-loop, within 1 subunit</i>   | <i>F144(S5)-F198&amp;F201(S6)</i>                           | <i>π-stacking</i>      | <i>4790 ±830</i>          |
| <i>F<sub>b</sub></i> | <i>Low interface VSD – S5/S6</i>  | <i>F107(S4)-F140(S5<sup>+</sup>)-F207(S6<sup>+</sup>)</i>   | <i>π-stacking</i>      | <i>2240±370</i>           |
| <i>G<sub>b</sub></i> | <i>High VSD</i>                   | <i>N49(S2)-R102(S4)</i>                                     | <i>H-bond/cation-π</i> | <i>1400±150</i>           |

**Table S3:** PHT binding sites.

| <i>Binding site</i>  | <i>Location</i>               | <i>Residues (Segment)</i>                                 | <i>Interactions</i>       | <i>K<sub>d</sub> (μM)</i> |
|----------------------|-------------------------------|-----------------------------------------------------------|---------------------------|---------------------------|
| <i>A<sub>p</sub></i> | <i>Gate S6, S4-S5</i>         | <i>N211(S6)-D219(S6<sup>+</sup>)</i>                      | <i>H-bond</i>             | <i>73±19</i>              |
| <i>B<sub>p</sub></i> | <i>Low interface VSD – S5</i> | <i>V113(S4)-P114(S4-S5)-L131&amp;L136(S5<sup>+</sup>)</i> | <i>Hydrophobic</i>        | <i>48±26</i>              |
| <i>C<sub>p</sub></i> | <i>S5, S4-S5</i>              | <i>I127(S4-S5)-L131&amp;I134(S5)</i>                      | <i>Hydrophobic</i>        | <i>294±84</i>             |
| <i>D<sub>p</sub></i> | <i>Low VSD</i>                | <i>F14&amp;I18 (S1)-R108,L109&amp;V113(S4)</i>            | <i>Hydrophobic/H-bond</i> | <i>19±8</i>               |
| <i>E<sub>p</sub></i> | <i>High VSD</i>               | <i>N49&amp;I53(S2)-I97(S3)-L98(S4)</i>                    | <i>Hydrophobic/H-bond</i> | <i>25±12</i>              |



## Supporting Figures

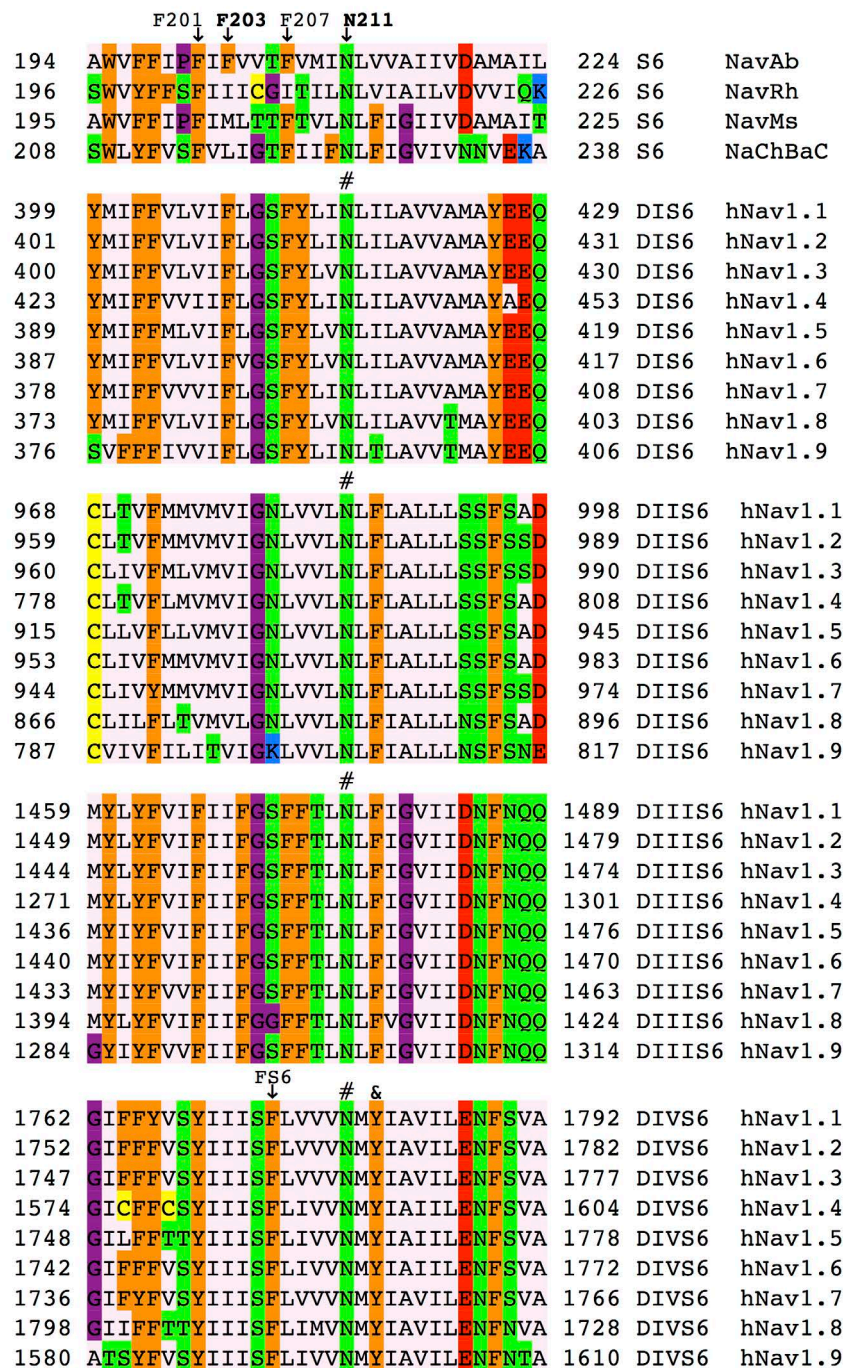

**Figure S1.** Sequence alignment of segments S6 of bacterial channels Nav<sub>v</sub>Ab, Nav<sub>v</sub>Rh, Nav<sub>v</sub>Ms and NaChBaC, and all 4 domains (DI to DIV) of human Nav<sub>v</sub>1.1 to Nav<sub>v</sub>1.9. Positions of F201, F203, F207 and N211 in Nav<sub>v</sub>Ab are indicated. Positions of conserved residues F1764 (FS6), Y1771 (&) and N418 (DI), N426 (DII), N1466 (DIII) and N1769 (DIV) (#), shown to be involved in drug binding in mammalian channels, are also marked (Nav<sub>v</sub>1.2 numbering). Sequences were aligned with the ClustalO program available on the Uniprot website and amino acids are colored using the Zappo color scheme (hydrophobic residues in pink, aromatic in orange, negatively charged in red, positively charged in blue, hydrophilic in green, P and G in magenta and C in yellow).



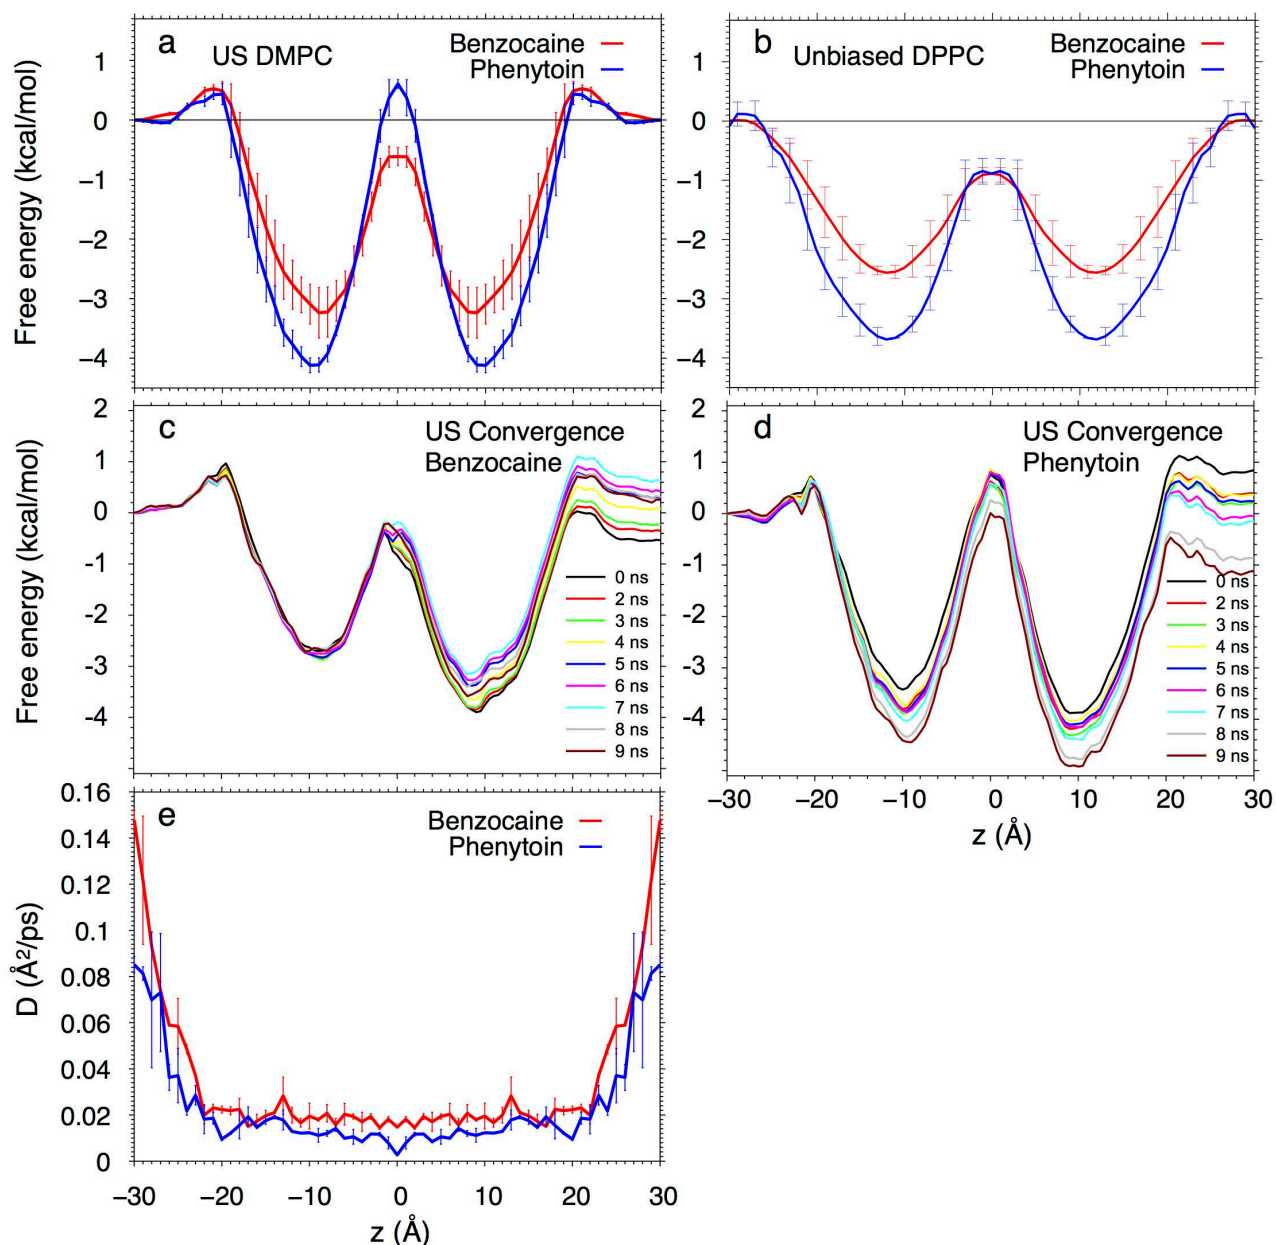

**Figure S2:** BZC (red) and PHT (blue) (a) PMFs across a DMPC lipid membrane hydrated by 0.15 M aqueous NaCl at 313 K (US calculations) and (b) PMFs across a DPPC lipid membrane from simulations of Na<sub>v</sub>Ab in the presence of BZC and PHT by sampling only the membrane regions away from the protein, with results consistent with panel a, but with reduced central PHT barrier. (c & d) Convergence of BZC (c) and PHT (d) US PMFs across DMPC bilayers. (e) BZC (red) and PHT (blue) diffusion coefficients across DMPC bilayers. Error bars represent asymmetry across the membrane.

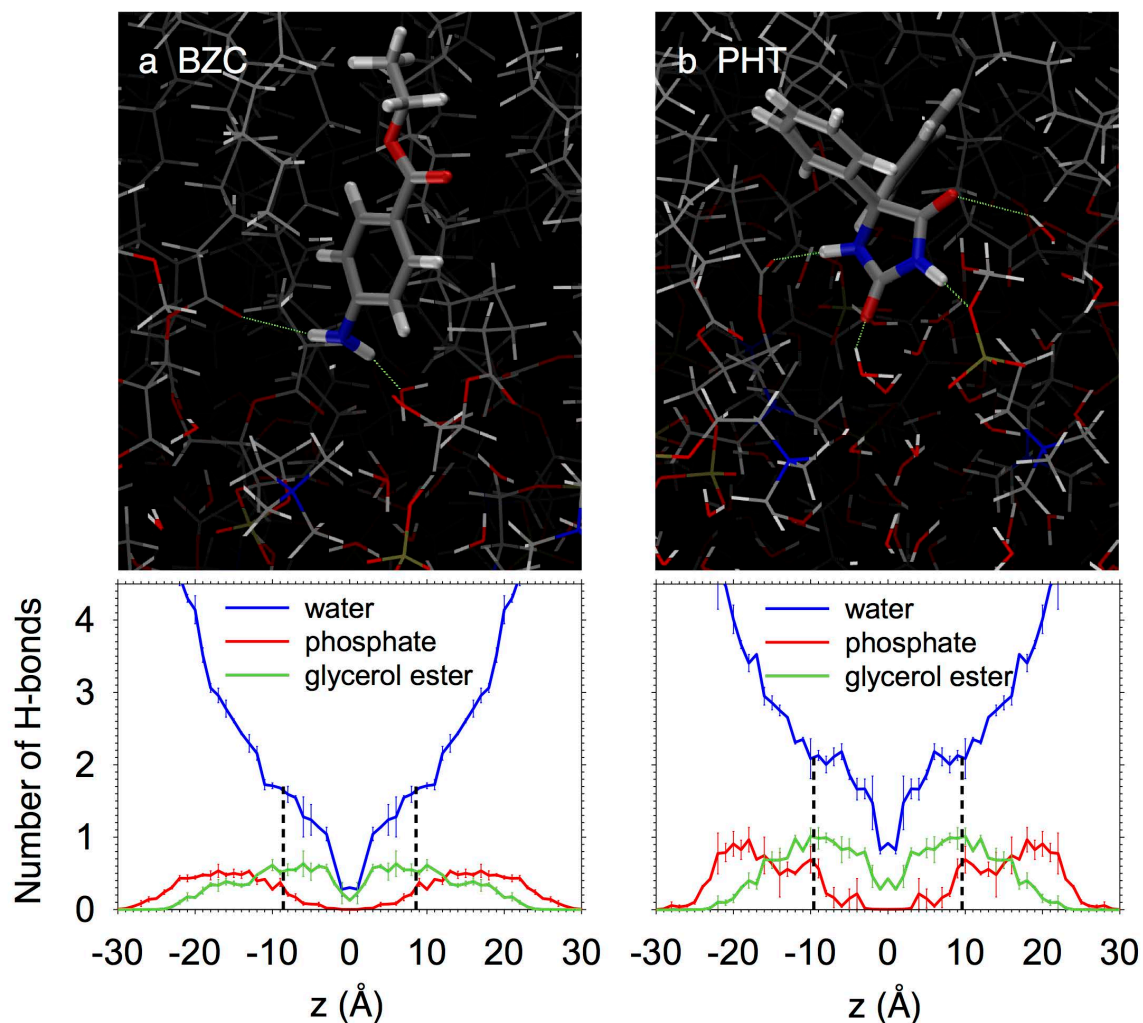

**Figure S3:** Interaction of BZC (a, top) and PHT (b, top) with lipids and water molecules inside the membrane near the free energy minima for each molecule. BZC and PHT molecules are shown in tube representation, lipid and water molecules in wireframe representation. C atoms are gray, H – white, O – red, N – blue, P – dark yellow. Hydrogen bonds to BZC/PHT are shown by green dotted lines. Bottom panels show mean H-bonding numbers with water, lipid phosphate and carbonyl groups as a function of drug position (H-bond  $D-H\cdots A$  defined when distance  $D\cdots A \leq 3.8$  Å and angle  $D-H\cdots A \geq 120^\circ$ ), with dashed black vertical lines representing minimum free energy positions for each molecule.

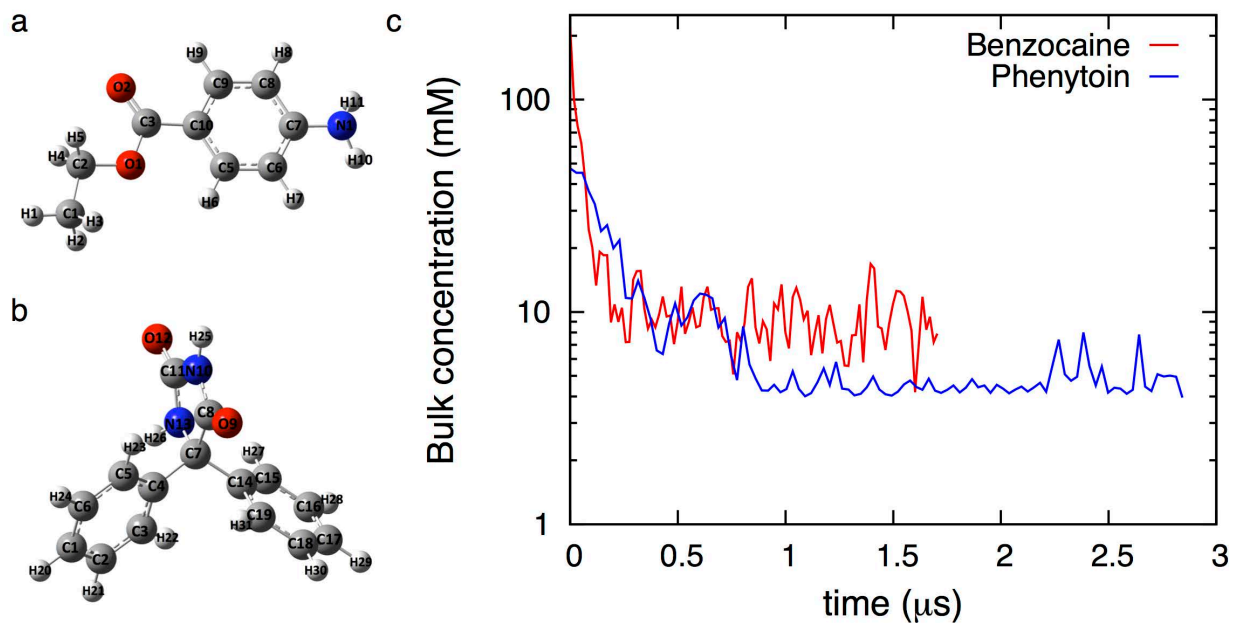

**Figure S4:** Ball-and-stick representations of (a) BZC and (b) PHT. (c) Bulk solvent concentrations during simulations, BZC (red) and PHT (blue).

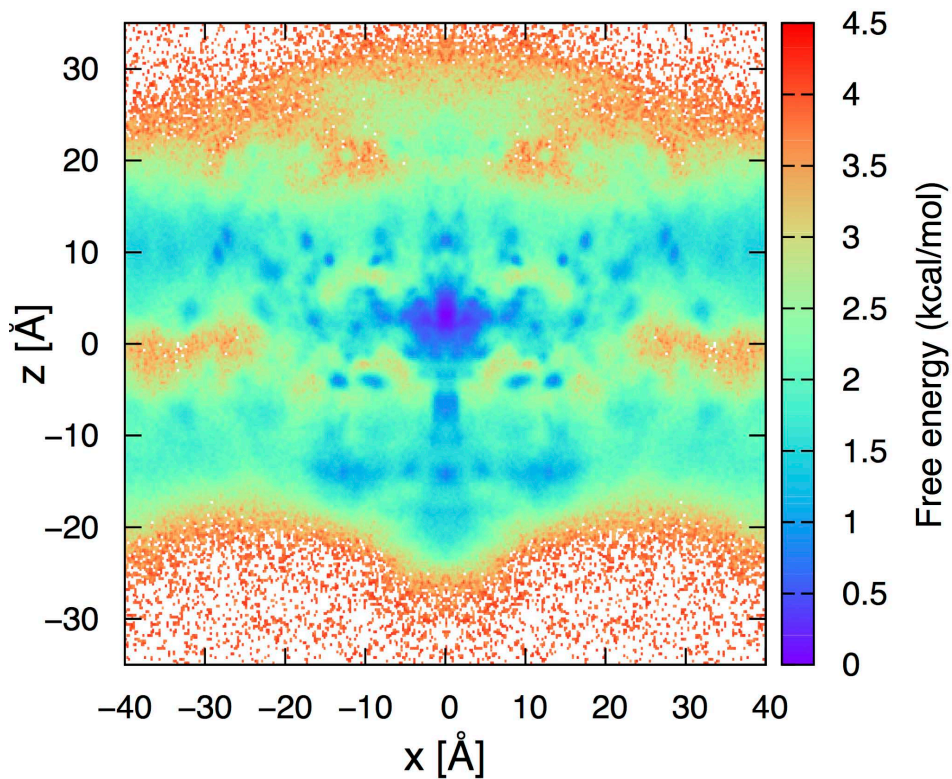

**Figure S5:** 2D free energy projection on x- and z- axis for BZC in the Na<sub>v</sub>Ab/BZC system, using full sampling along y.



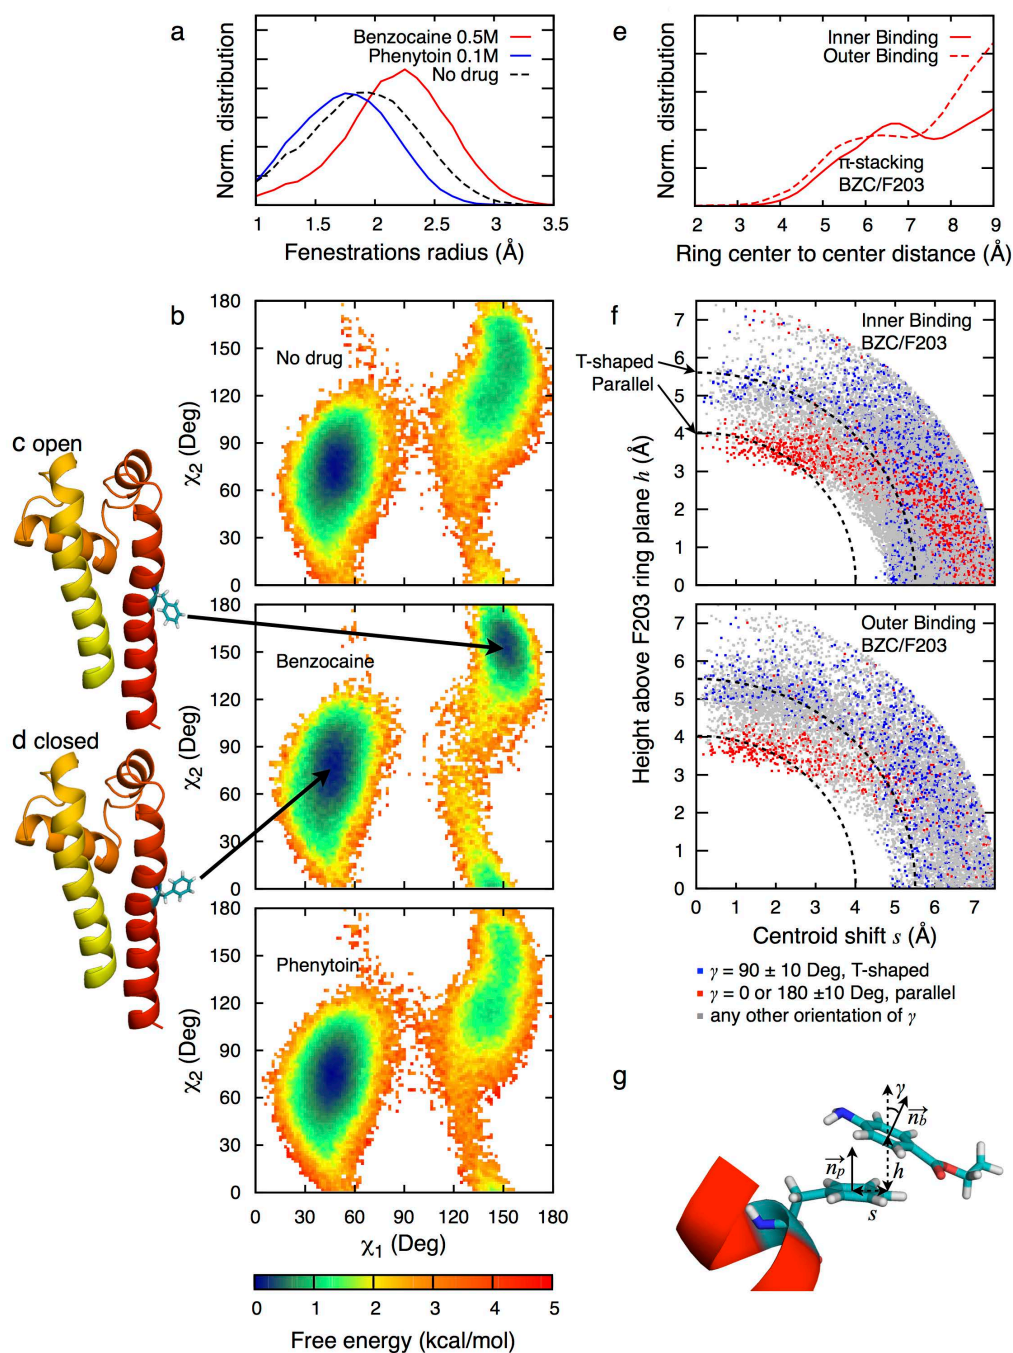

**Figure S6:** a) Distribution of fenestration radius in the presence of BZC (solid red) and PHT (solid blue) and in the absence of drug (dashed black), revealing an enlargement of the fenestrations in the presence of BZC. Fenestration radius was measured using CAVER 3.0 (51), using a spherical probe with minimum radius 1 Å to explore the opening in the PD (residues 130-221; aligned using backbone atoms), starting in the hydrophobic cavity (at the COM of all residues 203 and 204), using analysis of every 20th frame, with size corresponding to the radius at the bottleneck for each frame. b) Change in helix F203 rotamer free energy minima due to BZC binding. Panels c and d are insets for panel b, revealing different F203 orientations corresponding to closed and open fenestrations. e) Distribution of BZC relative to F203 from the cavity (inner binding, solid line) and membrane (outer binding, dashed line) facing sides, revealing a plateau corresponding to  $\pi$ -stacking region. f) Geometric characterization of the interactions compatible with  $\pi$ -stacking for inner (top) and outer binding (bottom) representing the distance  $h$  between the center of the benzocaine ring and the plane formed by the F203 ring as a function of the lateral shift  $s$  between the center of the ring, as described in panel (g). Dot color corresponds to the angle  $\gamma$  between ring normal vectors.

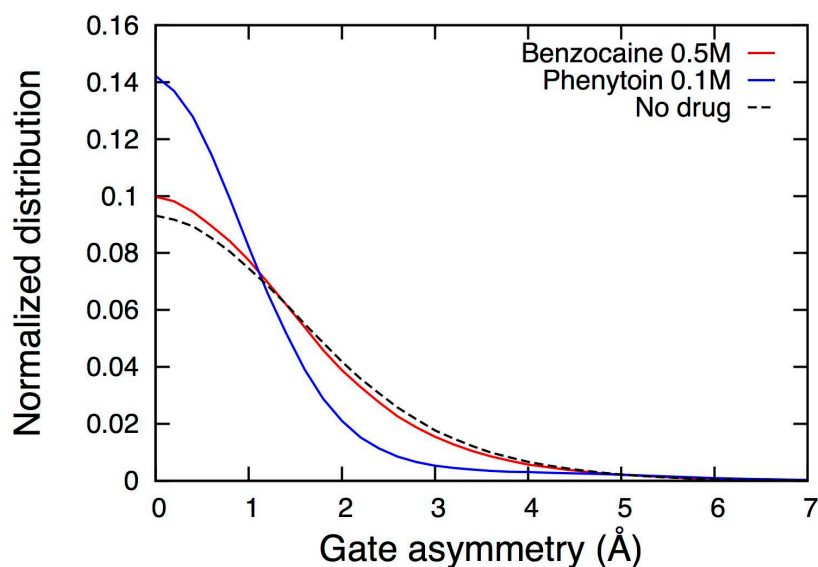

**Figure S7:**  $\text{Na}_v\text{Ab}$  gate asymmetry for simulations in the presence of BZC (solid red) and PHT (solid blue), and absence of drugs (dashed black), revealing a drastic change due to PHT. Gate asymmetry is measured as the difference between distances separating the COM of the  $\text{C}\alpha$  of residues 215–218 on pairs of opposite monomers.

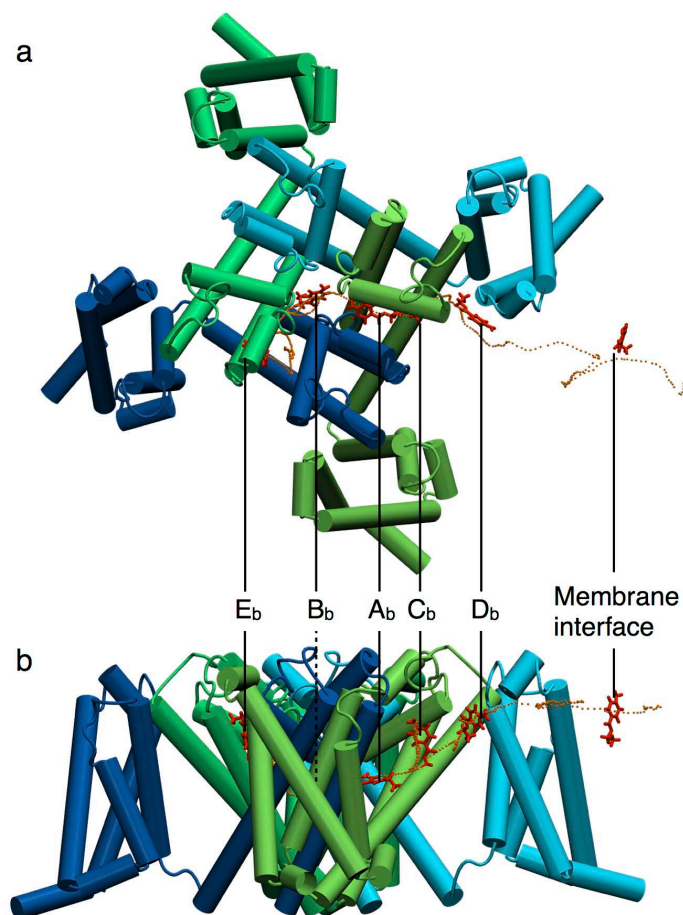

**Figure S8:** (A) Top-view of the channel showing the trajectory of a BZC molecule from the membrane interface to the cavity along the binding pathway from the membrane interface to site  $E_b$  via sites  $D_b$ ,  $C_b$ ,  $A_b$  and  $B_b$ , as indicated. (B) Corresponding side-view.

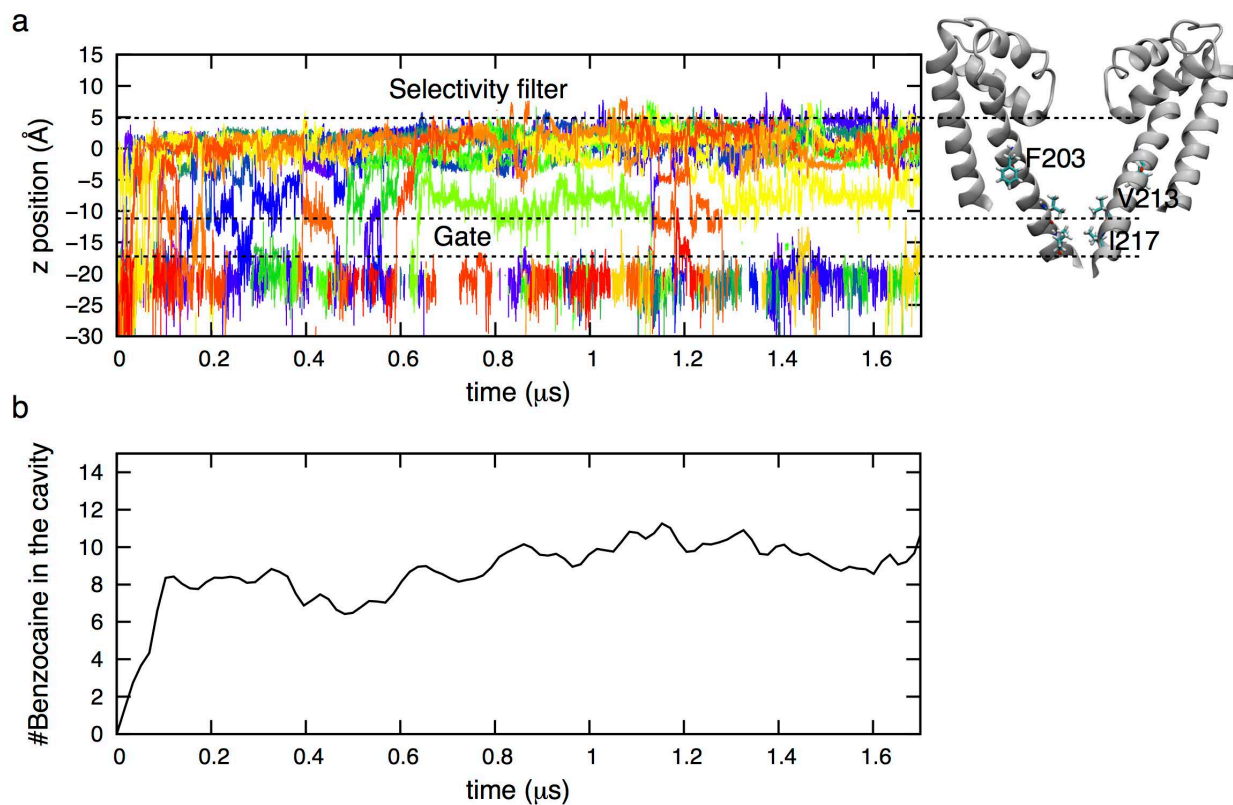

**Figure S9:** a) Time series showing the  $z$  position of the COM of BZC molecules entering the cavity, with corresponding representation of the PD with labeling of key residues F203, V213 and I217 (right). Only BZC molecules nearing or entering the pore ( $r < 15$  Å) via the gate are shown. b) Number of BZC molecules in the cavity as a function of time.

## Supporting References

1. Payandeh J, Scheuer T, Zheng N, & Catterall WA (2011) The crystal structure of a voltage-gated sodium channel. *Nature* 475(7356):353-358.
2. Klauda JB, *et al.* (2010) Update of the CHARMM all-atom additive force field for lipids: validation on six lipid types. *J Phys Chem B* 114(23):7830-7843.
3. Lascelles PT, Kocen RS, & Reynolds EH (1970) The distribution of plasma phenytoin levels in epileptic patients. *J Neurol Neurosurg Psychiat* 33:501-505.
4. Logan BK & Gordon AM (2005) Death of an infant involving benzocaine. *J Forensic Sci* 50(6):1486-1488.
5. Brooks B & Karplus M (1983) Harmonic dynamics of proteins: Normal modes and fluctuations in bovine pancreatic trypsin inhibitor. *Proc Natl Acad Sci USA* 80:6571-6575.
6. Brooks BR, *et al.* (2009) CHARMM: the biomolecular simulation program. *J Comput Chem* 30(10):1545-1614.
7. MacKerell Jr AD, *et al.* (1998) All-atom empirical potential for molecular modeling and dynamics studies of proteins. *J Phys Chem B* 102(18):3586-3616.
8. Mackerell AD, Jr., Feig M, & Brooks CL, 3rd (2004) Extending the treatment of backbone energetics in protein force fields: limitations of gas-phase quantum mechanics in reproducing protein conformational distributions in molecular dynamics simulations. *J Comput Chem* 25(11):1400-1415.
9. Jorgensen WL, Chandrasekhar J, Madura JD, Impey RW, & Klein ML (1983) Comparison of Simple Potential Functions for Simulating Liquid Water. *J Chem Phys* 79(2):926-935.
10. Phillips JC, *et al.* (2005) Scalable molecular dynamics with NAMD. *J Comput Chem* 26(16):1781-1802.
11. Andersen HC (1980) Molecular dynamics simulations at constant pressure and/or temperature. *J Chem Phys* 72(4):2384.
12. Feller SE, Zhang YH, Pastor RW, & Brooks BR (1995) Constant Pressure Molecular Dynamics Simulation: the Langevin Piston Method. *J Chem Phys* 103(11):4613-4621.
13. Nosé S (1984) A unified formulation of the constant temperature molecular dynamics methods. *J Chem Phys* 81:511.
14. Hoover WG (1985) Canonical dynamics: Equilibrium phase-space distributions. *Phys Rev A* 31(3):1695-1697.
15. Ryckaert J-P, Ciccotti G, & Berendsen HJC (1977) Numerical integration of the cartesian equations of motion of a system with constraints: molecular dynamics of n-alkanes. *J Comp Phys* 23(3):327-341.
16. Darden T, York D, & Pedersen L (1993) Particle mesh Ewald: An N log (N) method for Ewald sums in large systems. *J Chem Phys* 98:10089.
17. Shaw DE, *et al.* (2008) Anton, a special-purpose machine for molecular dynamics simulation. *Comm of the ACM* 51(7):91-97.
18. Tuckerman M, Berne BJ, & Martyna GJ (1992) Reversible multiple time scale molecular dynamics. *J Chem Phys* 97(3):1990.
19. Lippert RA, *et al.* (2013) Accurate and efficient integration for molecular dynamics simulations at constant temperature and pressure. *J Chem Phys* 139(16):164106.
20. Shan Y, Klepeis JL, Eastwood MP, Dror RO, & Shaw DE (2005) Gaussian split Ewald: A fast Ewald mesh method for molecular simulation. *J Chem Phys* 122(5):54101.
21. Berneche S & Roux B (2001) Energetics of ion conduction through the K<sup>+</sup> channel. *Nature* 414:73-77.
22. Noskov SY, Berneche S, & Roux B (2004) Control of ion selectivity in potassium channels by electrostatic and dynamic properties of carbonyl ligands. *Nature* 431(7010):830-834.
23. Allen TW, Andersen OS, & Roux B (2006) Molecular dynamics - potential of mean force calculations as a tool for understanding ion permeation and selectivity in narrow channels. *Biophys Chem* 124(3):251-267.
24. Venable RM, Luo Y, Gawrisch K, Roux B, & Pastor RW (2013) Simulations of Anionic Lipid Membranes: Development of Interaction-Specific Ion Parameters and Validation Using NMR Data. *J Phys Chem B* 117(35):10183-10192.
25. Noskov SY & Roux B (2008) Control of ion selectivity in LeuT: two Na<sup>+</sup> binding sites with two different mechanisms. *J Mol Biol* 377(3):804-818.
26. Beglov D & Roux B (1994) Finite Representation of an Infinite Bulk System: Solvent Boundary Potential for Computer Simulations. *J Chem Phys* 100(12):9050-9063.
27. Ávila CM & Martínez F (2003) Thermodynamics of partitioning of benzocaine in some organic solvent/buffer and liposome systems. *Chem Pharm Bull* 51(3):237-240.
28. Li L, Vorobyov I, MacKerell AD, & Allen TW (2008) Is arginine charged in a membrane? *Biophys J* 94(2):L11-13.
29. Torrie GM & Valleau JP (1977) Nonphysical sampling distributions in Monte Carlo free-energy estimation: Umbrella sampling. *J Comput Phys* 23(2):187-199.



30. Kumar S, Rosenberg JM, Bouzida D, Swendsen RH, & Kollman PA (1992) The weighted histogram analysis method for free-energy calculations on biomolecules. I. The method. *J Comput Chem* 13(8):1011-1021.
31. Vorobyov I, Bennett WFD, Tieleman DP, Allen TW, & Noskov S (2012) The Role of Atomic Polarization in the Thermodynamics of Chloroform Partitioning to Lipid Bilayers. *J Chem Theory Comput* 8(2):618-628.
32. Lukacova V, *et al.* (2007) Drug-membrane interactions studied in phospholipid monolayers adsorbed on nonporous alkylated microspheres. *J Biomol Screen* 12(2):186-202.
33. Vanommeslaeghe K, *et al.* (2010) CHARMM general force field: A force field for drug-like molecules compatible with the CHARMM all-atom additive biological force fields. *J Comput Chem* 31(4):671-690.
34. Pang KY, Braswell LM, Chang L, Sommer TJ, & Miller KW (1980) The perturbation of lipid bilayers by general anesthetics: a quantitative test of the disordered lipid hypothesis. *Mol Pharmacol* 18(1):84-90.
35. Kollman P (1993) Free-Energy Calculations - Applications to Chemical and Biochemical Phenomena. *Chemical Reviews* 93(7):2395-2417.
36. Deng Y & Roux B (2004) Hydration of Amino Acid Side Chains: Nonpolar and Electrostatic Contributions Calculated from Staged Molecular Dynamics Free Energy Simulations with Explicit Water Molecules. *J Phys Chem B* 108(42):16567-16576.
37. Natesan S, *et al.* (2013) Structural determinants of drug partitioning in n-hexadecane/water system. *J Chem Inf Model* 53(6):1424-1435.
38. Wohnsland F & Faller B (2001) High-Throughput Permeability pH Profile and High-Throughput Alkane/Water logP with Artificial Membranes. *J Med Chem* 44(6):923-930.
39. Crouzy S, Woolf TB, & Roux B (1994) A molecular dynamics study of gating in dioxolane-linked gramicidin A channels. *Biophys J* 67(4):1370-1386.
40. Allen TW, Andersen OS, & Roux B (2003) Structure of gramicidin a in a lipid bilayer environment determined using molecular dynamics simulations and solid-state NMR data. *J Am Chem Soc* 125(32):9868-9877.
41. Hummer G (2005) Position-dependent diffusion coefficients and free energies from Bayesian analysis of equilibrium and replica molecular dynamics simulations. *New J Phys* 7(1):34.
42. Vorobyov I, *et al.* (2014) Ion-induced defect permeation of lipid membranes. *Biophys J* 106(3):586-597.
43. Bernardi RC, *et al.* (2009) Molecular dynamics study of biomembrane/local anesthetics interactions. *Molecular Physics* 107(14):1437-1443.
44. Bernardi RC & Pascutti PG (2012) Hybrid QM/MM Molecular Dynamics Study of Benzocaine in a Membrane Environment: How Does a Quantum Mechanical Treatment of Both Anesthetic and Lipids Affect Their Interaction. *J Chem Theo Comput* 8(7):2197-2203.
45. Vanommeslaeghe K & MacKerell Jr AD (2012) Automation of the CHARMM General Force Field (CGenFF) I: bond perception and atom typing. *J Chem Inf Model* 52(12):3144-3154.
46. Vanommeslaeghe K, Raman EP, & MacKerell Jr AD (2012) Automation of the CHARMM General Force Field (CGenFF) II: assignment of bonded parameters and partial atomic charges. *J Chem Inf Model* 52(12):3155-3168.
47. Irwin JJ, Sterling T, Mysinger MM, Bolstad ES, & Coleman RG (2012) ZINC: a free tool to discover chemistry for biology. *J Chem Inf Model* 52(7):1757-1768.
48. Perrin DD (1965) *Dissociation constants of organic bases in aqueous solution* (Butterworths, London).
49. Schwartz PA, Rhodes CT, & Cooper JW (1977) Solubility and ionization characteristics of phenytoin. *J Pharm Sci* 66(7):994-997.
50. Verdolino V, Cammi R, Munk BH, & Schlegel HB (2008) Calculation of pKa values of nucleobases and the guanine oxidation products guanidinohydantoin and spiroiminodihydantoin using density functional theory and a polarizable continuum model. *J Phys Chem B* 112(51):16860-16873.
51. Chovancova E, *et al.* (2012) CAVER 3.0: a tool for the analysis of transport pathways in dynamic protein structures. *PLoS Comput Biol* 8(10):e1002708.
52. Tomasi J, Mennucci B, & Cammi R (2005) Quantum mechanical continuum solvation models. *Chem Rev* 105(8):2999-3093.
53. Foresman JB, Keith TA, Wiberg KB, Snoonian J, & Frisch MJ (1996) Solvent effects. 5. Influence of cavity shape, truncation of electrostatics, and electron correlation on ab initio reaction field calculations. *J Chem Phys* 100(40):16098-16104.
54. Singh UC & Kollman PA (1984) An Approach to Computing Electrostatic Charges for Molecules. *J Comput Chem* 5(2):129-145.
55. Besler BH, Merz KM, & Kollman PA (1990) Atomic Charges Derived from Semiempirical Methods. *J Comput Chem* 11(4):431-439.
56. Pulay P, Fogarasi G, Pang F, & Boggs JE (1979) Systematic ab initio gradient calculation of molecular geometries, force constants, and dipole moment derivatives. *J Am Chem Soc* 101(10):2550-2560.

## Appendix SA1

**Table SA1.** Relative conformation energies and dipole moments of PHT tautomers

|                                                            | 1         | 2             | 3             | 4         |
|------------------------------------------------------------|-----------|---------------|---------------|-----------|
|                                                            | di-lactam | lactam/lactim | lactim/lactam | di-lactim |
| <b>HF/6-31G(d)//HF/6-31G(d)</b>                            |           |               |               |           |
| $\mu(\text{vac}), \text{D}$                                | 3.17      | 3.38          | 5.72          | 3.36      |
| $\Delta E(\text{vacuum}), \text{kcal/mol}$                 | 0.00      | 28.01         | 19.95         | 37.09     |
| $\mu(\text{cHex}), \text{D}$                               | 3.35      | 3.68          | 6.16          | 3.66      |
| $\Delta G_{\text{sol}}(\text{cHex}), \text{kcal/mol}$      | -2.82     | -4.09         | -3.73         | -3.25     |
| $\Delta E(\text{cHex}), \text{kcal/mol}$                   | 0.00      | 26.74         | 19.04         | 36.66     |
| $\mu(\text{water}), \text{D}$                              | 3.71      | 4.59          | 6.92          | 4.63      |
| $\Delta G_{\text{sol}}(\text{water}), \text{kcal/mol}$     | -10.89    | -14.39        | -13.90        | -11.93    |
| $\Delta E(\text{water}), \text{kcal/mol}$                  | 0.00      | 24.51         | 16.94         | 36.05     |
| <b>MP2/6-31G(d)//MP2/6-31G(d)</b>                          |           |               |               |           |
| $\mu(\text{vac}), \text{D}$                                | 2.67      | 3.19          | 4.93          | 3.18      |
| $\Delta E(\text{vacuum}), \text{kcal/mol}$                 | 0.00      | 25.38         | 18.96         | 34.33     |
| $\mu(\text{cHex}), \text{D}$                               | 3.39      | 3.60          | 6.31          | 3.54      |
| $\Delta G_{\text{sol,elec}}(\text{cHex}), \text{kcal/mol}$ | -4.64     | -7.34         | -5.20         | -6.87     |
| $\Delta E(\text{cHex}), \text{kcal/mol}$                   | 0.00      | 22.68         | 18.40         | 32.10     |
| $\mu(\text{water}), \text{D}$                              | 4.69      | 5.34          | 8.95          | 5.01      |
| $\Delta G_{\text{sol,elec}}(\text{wat}), \text{kcal/mol}$  | -13.38    | -28.45        | -15.22        | -26.62    |
| $\Delta E(\text{wat}), \text{kcal/mol}$                    | 0.00      | 10.31         | 17.12         | 21.10     |

All relative conformational energies ( $\Delta E$ ) are with respect to di-lactam tautomers. HF/6-31G(d) solvation free energies ( $\Delta G_{\text{sol}}$ ) and relative conformational energies were obtained using single-point energy calculations with PCM continuum solvation model of Tomasi et al. (52). MP2/6-31G(d) solvation free energies (electrostatic component only,  $\Delta G_{\text{sol,elec}}$ ) and relative conformational energies were obtained using single-point energy calculations with IPCM model (53). cHex – cyclohexane, wat – water.

**Table SA2.** Partial atomic charges for BZC

| Atom name | Atom type | ESP (MK)      | CGENFF | new    |
|-----------|-----------|---------------|--------|--------|
| C1        | CG331     | <b>-0.327</b> | -0.269 | -0.269 |
| C2        | CG321     | <b>0.333</b>  | 0.060  | 0.060  |
| O1        | OG302     | <b>-0.431</b> | -0.307 | -0.307 |
| C3        | CG202     | <b>0.717</b>  | 0.466  | 0.466  |
| O2        | OG2D1     | <b>-0.526</b> | -0.494 | -0.494 |
| C4        | CG2R61    | <b>-0.090</b> | 0.086  | 0.086  |
| C5        | CG2R61    | <b>-0.198</b> | -0.107 | -0.140 |
| C6        | CG2R61    | <b>-0.149</b> | -0.112 | -0.140 |
| C7        | CG2R61    | <b>0.278</b>  | 0.058  | 0.168  |
| C8        | CG2R61    | <b>-0.142</b> | -0.112 | -0.140 |
| C9        | CG2R61    | <b>-0.214</b> | -0.107 | -0.140 |
| N1        | NG2S3     | <b>-0.817</b> | -0.834 | -0.742 |
| H1        | HGA3      | <b>0.078</b>  | 0.090  | 0.090  |
| H2        | HGA3      | <b>0.093</b>  | 0.090  | 0.090  |
| H3        | HGA3      | <b>0.100</b>  | 0.090  | 0.090  |
| H4        | HGA2      | <b>0.000</b>  | 0.090  | 0.090  |
| H5        | HGA2      | <b>0.010</b>  | 0.090  | 0.090  |
| H6        | HGR61     | <b>0.153</b>  | 0.115  | 0.115  |
| H7        | HGR61     | <b>0.142</b>  | 0.115  | 0.115  |
| H8        | HGR61     | <b>0.142</b>  | 0.115  | 0.115  |
| H9        | HGR61     | <b>0.146</b>  | 0.115  | 0.115  |
| H10       | HGP4      | <b>0.350</b>  | 0.381  | 0.341  |
| H11       | HGP4      | <b>0.353</b>  | 0.381  | 0.341  |

**ESP(MK)** are partial atomic charges obtained from fitting to MP2/6-31G(d) electrostatic potential using the Merz-Singh-Kollman scheme (54, 55). **CGENFF** are partial atomic charges generated using CGENFF program (version 0.9.7 beta). **new** are optimized partial atomic charges used in this study. See Figure S4A for atom names.

**Table SA3.** Partial atomic charges for PHT

| Atom name | Atom type | ESP (MK)      | CGENFF | new    |
|-----------|-----------|---------------|--------|--------|
| C1        | CG2R61    | <b>-0.125</b> | -0.115 | -0.115 |
| C2        | CG2R61    | <b>-0.126</b> | -0.110 | -0.110 |
| C3        | CG2R61    | <b>-0.156</b> | -0.130 | -0.155 |
| C4        | CG2R61    | <b>0.116</b>  | -0.003 | 0.121  |
| C5        | CG2R61    | <b>-0.213</b> | -0.130 | -0.155 |
| C6        | CG2R61    | <b>-0.090</b> | -0.110 | -0.110 |
| C7        | CG3C50    | <b>0.033</b>  | 0.797  | 0.160  |
| C8        | CG2R53    | <b>0.577</b>  | -0.116 | 0.513  |
| O9        | OG2D1     | <b>-0.463</b> | -0.498 | -0.470 |
| N10       | NG2R53    | <b>-0.618</b> | -0.219 | -0.500 |
| C11       | CG2R53    | <b>0.709</b>  | 0.302  | 0.490  |
| O12       | OG2D1     | <b>-0.506</b> | -0.435 | -0.450 |
| N13       | NG2R53    | <b>-0.614</b> | -0.501 | -0.560 |
| C14       | CG2R61    | <b>0.204</b>  | -0.003 | 0.120  |
| C15       | CG2R61    | <b>-0.151</b> | -0.130 | -0.155 |
| C16       | CG2R61    | <b>-0.159</b> | -0.110 | -0.110 |
| C17       | CG2R61    | <b>-0.116</b> | -0.115 | -0.115 |
| C18       | CG2R61    | <b>-0.120</b> | -0.110 | -0.110 |
| C19       | CG2R61    | <b>-0.211</b> | -0.130 | -0.155 |
| H20       | HGR61     | <b>0.124</b>  | 0.115  | 0.115  |
| H21       | HGR61     | <b>0.131</b>  | 0.115  | 0.115  |
| H22       | HGR61     | <b>0.116</b>  | 0.115  | 0.115  |
| H23       | HGR61     | <b>0.148</b>  | 0.115  | 0.115  |
| H24       | HGR61     | <b>0.125</b>  | 0.115  | 0.115  |
| H25       | HGP1      | <b>0.390</b>  | 0.372  | 0.372  |
| H26       | HGP1      | <b>0.360</b>  | 0.344  | 0.344  |
| H27       | HGR61     | <b>0.111</b>  | 0.115  | 0.115  |
| H28       | HGR61     | <b>0.137</b>  | 0.115  | 0.115  |
| H29       | HGR61     | <b>0.121</b>  | 0.115  | 0.115  |
| H30       | HGR61     | <b>0.133</b>  | 0.115  | 0.115  |
| H31       | HGR61     | <b>0.134</b>  | 0.115  | 0.115  |

**ESP(MK)** are partial atomic charges obtained from fitting to MP2/6-31G(d) electrostatic potential using the Merz-Singh-Kollman scheme (54, 55). **CGENFF** are partial atomic charges generated using CGENFF program (version 0.9.7 beta). **new** are optimized partial atomic charges used in this study. See Figure S4B for atom names.

**Table SA4.** Dipole moment magnitude and orientation for BZC

|                      | <b>QM</b>     | <b>CGENFF</b> | <b>new</b> |
|----------------------|---------------|---------------|------------|
| $\mu_x$              | <b>-1.709</b> | -0.531        | -1.408     |
| $\mu_y$              | <b>-2.149</b> | -2.197        | -2.468     |
| $\mu_z$              | <b>1.250</b>  | 1.199         | 1.315      |
| $\mu_{\text{total}}$ | <b>3.017</b>  | 2.559         | 3.131      |
| $\mu_x/\mu_y$        | <b>0.795</b>  | 0.242         | 0.571      |
| $\mu_y/\mu_z$        | <b>-1.719</b> | -1.832        | -1.878     |
| $\mu_x/\mu_z$        | <b>-1.367</b> | -0.443        | -1.071     |

**QM** are dipole component/magnitude values obtained from MP2/6-31G(d) calculations. **CGENFF** are dipole component/magnitude values obtained using CGENFF program (version 0.9.7 beta). **new** are dipole component/magnitude values obtained using optimized CHARMM parameters used in this study.

**Table SA5.** Dipole moment magnitude and orientation for PHT

|                      | <b>QM</b>     | <b>CGENFF</b> | <b>new</b> |
|----------------------|---------------|---------------|------------|
| $\mu_x$              | <b>-0.368</b> | 0.451         | -0.072     |
| $\mu_y$              | <b>-2.520</b> | -3.902        | -2.982     |
| $\mu_z$              | <b>-0.803</b> | -4.125        | -0.904     |
| $\mu_{\text{total}}$ | <b>2.670</b>  | 5.696         | 3.117      |
| $\mu_x/\mu_y$        | <b>0.146</b>  | -0.116        | 0.024      |
| $\mu_y/\mu_z$        | <b>3.137</b>  | 0.946         | 3.298      |
| $\mu_x/\mu_z$        | <b>0.458</b>  | -0.109        | 0.080      |

**QM** are dipole component/magnitude values obtained from MP2/6-31G(d) calculations. **CGENFF** are dipole component/magnitude values obtained using CGENFF program (version 0.9.7 beta). **new** are dipole component/magnitude values obtained using optimized CHARMM parameters used in this study.

**Table SA6.** Interactions of BZC with water in vacuum

| #   | Orientation                     | QM          |               |              | new      |            |          |             |              |
|-----|---------------------------------|-------------|---------------|--------------|----------|------------|----------|-------------|--------------|
|     |                                 | <i>R</i>    | $\theta$      | <i>IE</i>    | <i>R</i> | $\Delta R$ | $\theta$ | <i>IE</i>   | $\Delta IE$  |
| 1   | C=O...HOH linear                | <b>2.05</b> |               | <b>-5.72</b> | 1.77     | -0.28      |          | -6.00       | -0.28        |
| 2   | C=O...HOH 120°, tow. O2         | <b>2.66</b> |               | <b>-3.47</b> | 2.69     | 0.03       |          | -2.93       | 0.54         |
| 3   | C=O...HOH 120°, tow. C4         | <b>3.12</b> |               | <b>-1.41</b> | 2.99     | -0.13      |          | -1.93       | -0.52        |
| 4   | C-O...HOH 180°                  | <b>3.89</b> |               | <b>-0.35</b> | 2.99     | -0.90      |          | 0.38        | 0.73         |
| 5   | C-O...HOH 90°                   | <b>2.43</b> |               | <b>-1.14</b> | 2.02     | -0.41      |          | -1.94       | -0.80        |
| 6   | C-O...HOH var. angle            | <b>2.25</b> | <b>61.63</b>  | <b>-2.48</b> | 1.89     | -0.36      | 65       | -2.67       | -0.19        |
| 7   | N-H10...HOH linear out of plane | <b>2.31</b> |               | <b>-3.04</b> | 1.95     | -0.36      |          | -3.94       | -0.90        |
| 8   | N-H10...HOH linear in plane     | <b>2.18</b> |               | <b>-4.98</b> | 1.91     | -0.27      |          | -5.17       | -0.19        |
| 9   | N-H11...HOH linear out of plane | <b>2.30</b> |               | <b>-3.12</b> | 1.95     | -0.35      |          | -4.03       | -0.91        |
| 10  | N-H11...HOH linear in plane     | <b>2.17</b> |               | <b>-5.07</b> | 1.91     | -0.26      |          | -5.24       | -0.17        |
| 11  | H2N...HOH var. angle            | <b>2.19</b> | <b>110.59</b> | <b>-5.20</b> | 1.99     | -0.20      | 134      | -5.08       | 0.12         |
| 11a | H2N...HOH 110.59° angle         | <b>2.19</b> |               | <b>-5.20</b> | 1.96     | -0.23      |          | -4.65       | 0.55         |
| 13  | C5-H6...HOH linear in plane     | <b>2.37</b> |               | <b>-0.87</b> | 2.67     | 0.30       |          | 0.10        | 0.97         |
| 14  | C6-H7...HOH linear in plane     | <b>2.65</b> |               | <b>-1.95</b> | 2.70     | 0.05       |          | -1.33       | 0.62         |
| 15  | C8-H8...HOH linear in plane     | <b>2.66</b> |               | <b>-1.93</b> | 2.70     | 0.04       |          | -1.40       | 0.53         |
| 16  | C9-H9...HOH linear in plane     | <b>4.30</b> |               | <b>-0.23</b> | 2.78     | -1.52      |          | -0.44       | -0.21        |
|     |                                 |             |               |              |          |            |          | <b>AE</b>   | <b>-0.01</b> |
|     |                                 |             |               |              |          |            |          | <b>RMSE</b> | <b>0.57</b>  |

**QM** results are from HF/6-31G(d)//MP2/6-31G(d) calculations. **new** results are from calculations using optimized CHARMM force field parameters used in this study. *R* are interaction distances in Å, *IE* are interaction energies in kcal/mol.  $\theta$  are interaction angles in degrees. **AE** is an average error in *IEs*, **RMSE** – root mean square error in *IEs*.

**Table SA6 (continued).** Interactions of BZC with water in vacuum

| #   | Orientation                     | QM          |               |                | CGENFF   |            |          |             |              |
|-----|---------------------------------|-------------|---------------|----------------|----------|------------|----------|-------------|--------------|
|     |                                 | <i>R</i>    | $\theta$      | 1.16 <i>IE</i> | <i>R</i> | $\Delta R$ | $\theta$ | <i>IE</i>   | $\Delta IE$  |
| 1   | C=O...HOH linear                | <b>2.05</b> |               | <b>-5.72</b>   | 1.77     | -0.28      |          | -5.86       | -0.14        |
| 2   | C=O...HOH 120°, tow. O2         | <b>2.66</b> |               | <b>-3.47</b>   | 2.71     | 0.05       |          | -2.78       | 0.68         |
| 3   | C=O...HOH 120°, tow. C4         | <b>3.12</b> |               | <b>-1.41</b>   | 2.99     | -0.13      |          | -1.56       | -0.14        |
| 4   | C-O...HOH 180°                  | <b>3.89</b> |               | <b>-0.35</b>   | 2.99     | -0.90      |          | 0.15        | 0.50         |
| 5   | C-O...HOH 90°                   | <b>2.43</b> |               | <b>-1.14</b>   | 2.02     | -0.41      |          | -1.78       | -0.64        |
| 6   | C-O...HOH var. angle            | <b>2.25</b> | <b>61.63</b>  | <b>-2.48</b>   | 1.89     | -0.36      | 65       | -2.46       | 0.02         |
| 7   | N-H10...HOH linear out of plane | <b>2.31</b> |               | <b>-3.04</b>   | 1.98     | -0.33      |          | -3.63       | -0.59        |
| 8   | N-H10...HOH linear in plane     | <b>2.18</b> |               | <b>-4.98</b>   | 1.95     | -0.23      |          | -4.62       | 0.36         |
| 9   | N-H11...HOH linear out of plane | <b>2.30</b> |               | <b>-3.12</b>   | 1.97     | -0.33      |          | -3.70       | -0.58        |
| 10  | N-H11...HOH linear in plane     | <b>2.17</b> |               | <b>-5.07</b>   | 1.94     | -0.23      |          | -4.70       | 0.38         |
| 11  | H2N...HOH var. angle            | <b>2.19</b> | <b>110.59</b> | <b>-5.20</b>   | 1.96     | -0.23      | 133      | -6.22       | -1.02        |
| 11a | H2N...HOH 110.59° angle         | <b>2.19</b> |               | <b>-5.20</b>   | 1.93     | -0.26      |          | -5.68       | -0.48        |
| 13  | C5-H6...HOH linear in plane     | <b>2.37</b> |               | <b>-0.87</b>   | 2.65     | 0.28       |          | -0.14       | 0.73         |
| 14  | C6-H7...HOH linear in plane     | <b>2.65</b> |               | <b>-1.95</b>   | 2.69     | 0.04       |          | -1.33       | 0.62         |
| 15  | C8-H8...HOH linear in plane     | <b>2.66</b> |               | <b>-1.93</b>   | 2.69     | 0.03       |          | -1.41       | 0.52         |
| 16  | C9-H9...HOH linear in plane     | <b>4.30</b> |               | <b>-0.23</b>   | 2.71     | -1.59      |          | -0.77       | -0.54        |
|     |                                 |             |               |                |          |            |          | <b>AE</b>   | <b>-0.02</b> |
|     |                                 |             |               |                |          |            |          | <b>RMSE</b> | <b>0.53</b>  |

**QM** results are from HF/6-31G(d)//MP2/6-31G(d) calculations. **CGENFF** results are from calculations using CGENFF program (version 0.9.7 beta). *R* are interaction distances in Å, *IE* are interaction energies in kcal/mol.  $\theta$  are interaction angles in degrees. **AE** is an average error in *IE*s, **RMSE** – root mean square error in *IE*s.



**Table SA7.** Interactions of PHT with water in vacuum

| # | Orientation                   | QM          |                | CGENFF   |           |             |                    | new      |           |             |                    |
|---|-------------------------------|-------------|----------------|----------|-----------|-------------|--------------------|----------|-----------|-------------|--------------------|
|   |                               | <i>R</i>    | <i>1.16 IE</i> | <i>R</i> | <i>dR</i> | <i>IE</i>   | $\Delta$ <i>IE</i> | <i>R</i> | <i>dR</i> | <i>IE</i>   | $\Delta$ <i>IE</i> |
| 1 | C8=O9...HOH linear            | <b>2.09</b> | <b>-5.08</b>   | 1.73     | -0.36     | -7.97       | -2.88              | 1.79     | -0.30     | -5.32       | -0.24              |
| 2 | C8=O9...HOH 120 deg. tow. C7  | <b>4.31</b> | <b>-0.94</b>   | 3.48     | -0.83     | -2.46       | -1.52              | 3.78     | -0.53     | -1.09       | -0.16              |
| 3 | C8=O9...HOH 120 deg. tow. N10 | <b>2.02</b> | <b>-6.60</b>   | 1.71     | -0.31     | -9.60       | -3.00              | 1.77     | -0.25     | -6.04       | 0.56               |
| 4 | N10-H...OH2 in plane          | <b>1.95</b> | <b>-7.84</b>   | 1.79     | -0.16     | -7.67       | 0.17               | 1.82     | -0.13     | -7.37       | 0.47               |
| 5 | N10-H...OH2 90°               | <b>1.96</b> | <b>-7.07</b>   | 1.8      | -0.16     | -6.99       | 0.08               | 1.83     | -0.13     | -6.91       | 0.16               |
| 6 | N10...HOH 90°                 | <b>4.37</b> | <b>-0.54</b>   | 2.83     | -1.54     | -1.48       | -0.94              | 4.06     | -0.31     | -0.83       | -0.29              |
| 7 | C11=O12...HOH linear          | <b>2.08</b> | <b>-5.26</b>   | 1.8      | -0.28     | -5.27       | -0.01              | 1.80     | -0.28     | -5.38       | -0.12              |
| 8 | C11=O12...HOH 120° tow. N10   | <b>2.00</b> | <b>-7.14</b>   | 1.76     | -0.24     | -6.41       | 0.73               | 1.77     | -0.23     | -6.61       | 0.52               |
| 9 | C11=O12...HOH 120° tow. N13   | <b>2.01</b> | <b>-7.23</b>   | 1.76     | -0.25     | -7.67       | -0.43              | 1.78     | -0.23     | -6.71       | 0.53               |
| # | N13-H...OH2 in plane          | <b>2.01</b> | <b>-6.60</b>   | 1.83     | -0.18     | -8.83       | -2.23              | 1.85     | -0.16     | -6.63       | -0.02              |
| # | N13-H...OH2 90°               | <b>2.03</b> | <b>-6.04</b>   | 1.83     | -0.20     | -8.82       | -2.78              | 1.86     | -0.17     | -6.31       | -0.27              |
| # | H13...HOH 90°                 | <b>5.15</b> | <b>-1.19</b>   | 4.56     | -0.59     | -0.83       | 0.36               | 4.50     | -0.65     | -1.07       | 0.12               |
|   |                               |             |                |          |           | <b>AE</b>   | <b>-1.04</b>       |          |           | <b>AE</b>   | <b>0.11</b>        |
|   |                               |             |                |          |           | <b>RMSE</b> | <b>1.65</b>        |          |           | <b>RMSE</b> | <b>0.33</b>        |

**QM** results are from HF/6-31G(d)//MP2/6-31G(d) calculations. **CGENFF** results are from calculations using CGENFF program (version 0.9.7 beta). **new** results are from calculations using optimized CHARMM force field parameters used in this study. *R* are interaction distances in Å, *IE* are interaction energies in kcal/mol.  $\theta$  are interaction angles in degrees. **AE** is an average error in *IEs*, **RMSE** – root mean square error in *IEs*.

**Table SA8.** BZC optimized geometry in vacuum

|                        | QM            | CGENFF |              | new    |              |
|------------------------|---------------|--------|--------------|--------|--------------|
| <b>Bond lengths</b>    |               |        | <i>diff.</i> |        | <i>diff.</i> |
| C1-C2                  | <b>1.512</b>  | 1.528  | 0.016        | 1.527  | 0.015        |
| C2-O1                  | <b>1.447</b>  | 1.441  | -0.006       | 1.438  | -0.009       |
| O1-C3                  | <b>1.359</b>  | 1.342  | -0.017       | 1.342  | -0.017       |
| C3-O2                  | <b>1.224</b>  | 1.222  | -0.002       | 1.222  | -0.001       |
| C3-C4                  | <b>1.482</b>  | 1.509  | 0.027        | 1.511  | 0.029        |
| C4-C5                  | <b>1.400</b>  | 1.408  | 0.008        | 1.409  | 0.009        |
| C5-C6                  | <b>1.389</b>  | 1.402  | 0.013        | 1.403  | 0.014        |
| C6-C7                  | <b>1.404</b>  | 1.398  | -0.006       | 1.398  | -0.006       |
| C7-C8                  | <b>1.404</b>  | 1.398  | -0.006       | 1.398  | -0.006       |
| C8-C9                  | <b>1.390</b>  | 1.402  | 0.012        | 1.403  | 0.012        |
| C9-C4                  | <b>1.401</b>  | 1.412  | 0.011        | 1.413  | 0.013        |
| C7-N1                  | <b>1.399</b>  | 1.386  | -0.013       | 1.386  | -0.014       |
| N1-H10                 | <b>1.015</b>  | 0.998  | -0.016       | 1.014  | -0.001       |
| N1-H11                 | <b>1.015</b>  | 0.999  | -0.016       | 1.014  | 0.000        |
| <b>Bond angles</b>     |               |        |              |        |              |
| C1-C2-O1               | <b>106.5</b>  | 108.5  | 1.9          | 107.6  | 1.0          |
| C2-O1-C3               | <b>114.5</b>  | 112.0  | -2.4         | 113.7  | -0.8         |
| O1-C3-O2               | <b>123.1</b>  | 123.9  | 0.8          | 123.3  | 0.3          |
| O2-C3-C4               | <b>124.8</b>  | 122.8  | -2.0         | 124.0  | -0.8         |
| C3-C4-C5               | <b>118.0</b>  | 118.8  | 0.8          | 118.7  | 0.7          |
| C3-C4-C9               | <b>122.6</b>  | 122.6  | 0.1          | 122.9  | 0.3          |
| C4-C5-C6               | <b>120.4</b>  | 120.7  | 0.3          | 120.8  | 0.4          |
| C5-C6-C7               | <b>120.5</b>  | 120.1  | -0.4         | 120.1  | -0.4         |
| C6-C7-C8               | <b>118.7</b>  | 119.9  | 1.1          | 119.9  | 1.2          |
| C7-C8-C9               | <b>120.8</b>  | 120.1  | -0.6         | 120.1  | -0.6         |
| C8-C9-C4               | <b>120.1</b>  | 120.6  | 0.5          | 120.6  | 0.5          |
| C9-C4-C5               | <b>119.4</b>  | 118.5  | -0.9         | 118.4  | -1.0         |
| C6-C7-N1               | <b>120.6</b>  | 120.1  | -0.5         | 120.0  | -0.5         |
| C8-C7-N1               | <b>120.5</b>  | 120.1  | -0.5         | 120.1  | -0.5         |
| <b>Dihedral angles</b> |               |        |              |        |              |
| H10-N1-C7              | <b>114.0</b>  | 111.7  | -2.3         | 113.2  | -0.8         |
| H11-N1-C7              | <b>114.0</b>  | 111.7  | -2.3         | 113.1  | -0.9         |
| H10-N1-H11             | <b>110.6</b>  | 119.9  | 9.3          | 110.8  | 0.2          |
| C1-C2-O1-C3            | <b>-180.0</b> | -179.9 | 0.0          | -179.9 | 0.1          |
| C2-O1-C3-O2            | <b>-0.1</b>   | -0.2   | -0.1         | -0.2   | -0.1         |
| C2-O1-C3-C4            | <b>179.9</b>  | 179.9  | 0.0          | 179.9  | 0.0          |
| O1-C3-C4-C5            | <b>179.9</b>  | -179.6 | 0.5          | -179.7 | 0.4          |
| O1-C3-C4-C9            | <b>0.9</b>    | 0.3    | -0.6         | 0.3    | -0.6         |
| H10-N1-C7-C6           | <b>-156.6</b> | -158.3 | -1.8         | -152.8 | 3.8          |
| H11-N1-C7-C6           | <b>-28.3</b>  | -20.9  | 7.4          | -25.8  | 2.5          |
| H10-N1-C7-C8           | <b>28.6</b>   | 21.5   | -7.1         | 26.6   | -2.0         |
| H11-N1-C7-C8           | <b>156.9</b>  | 158.9  | 2.0          | 153.6  | -3.3         |

**QM** results are from MP2/6-31G(d) calculations. **CGENFF** results are from calculations using CGENFF program (version 0.9.7 beta). **new** results are from calculations using optimized CHARMM force field parameters used in this study. Bond lengths are in Å, bond and dihedral angles are in degrees.

**Table SA9.** PHT optimized geometry in vacuum

|                        | <b>QM</b>     | <b>CGENFF</b> |              | <b>new</b> |              |
|------------------------|---------------|---------------|--------------|------------|--------------|
| <b>Bond lengths</b>    |               |               | <i>diff.</i> |            | <i>diff.</i> |
| C4-C7                  | <b>1.521</b>  | 1.561         | 0.040        | 1.523      | 0.001        |
| C7-C8                  | <b>1.543</b>  | 1.548         | 0.005        | 1.533      | -0.010       |
| C8-O9                  | <b>1.220</b>  | 1.235         | 0.014        | 1.232      | 0.012        |
| C8-N10                 | <b>1.376</b>  | 1.373         | -0.003       | 1.365      | -0.010       |
| N10-H25                | <b>1.014</b>  | 1.012         | -0.003       | 1.004      | -0.010       |
| N10-C11                | <b>1.407</b>  | 1.375         | -0.032       | 1.372      | -0.035       |
| C11-O12                | <b>1.219</b>  | 1.223         | 0.004        | 1.221      | 0.003        |
| C11-N13                | <b>1.379</b>  | 1.374         | -0.006       | 1.376      | -0.003       |
| N13-H26                | <b>1.015</b>  | 1.006         | -0.009       | 1.012      | -0.003       |
| N13-C7                 | <b>1.465</b>  | 1.454         | -0.010       | 1.466      | 0.001        |
| C7-C14                 | <b>1.519</b>  | 1.561         | 0.042        | 1.524      | 0.005        |
| <b>Bond angles</b>     |               |               |              |            |              |
| C3-C4-C7               | <b>117.9</b>  | 118.7         | 0.8          | 118.0      | 0.1          |
| C4-C7-C8               | <b>112.0</b>  | 111.0         | -1.0         | 111.8      | -0.2         |
| C7-C8-O9               | <b>126.8</b>  | 131.3         | 4.6          | 127.9      | 1.2          |
| C7-C8-N10              | <b>105.9</b>  | 101.8         | -4.0         | 104.6      | -1.3         |
| C8-N10-H25             | <b>124.0</b>  | 121.8         | -2.2         | 122.7      | -1.3         |
| C8-N10-C11             | <b>113.6</b>  | 117.4         | 3.7          | 114.6      | 1.0          |
| N10-C11-O12            | <b>126.2</b>  | 128.2         | 2.0          | 126.6      | 0.4          |
| N10-C11-N13            | <b>105.3</b>  | 105.1         | -0.2         | 106.6      | 1.3          |
| C11-N13-H26            | <b>116.9</b>  | 124.6         | 7.7          | 118.0      | 1.1          |
| C11-N13-C7             | <b>112.9</b>  | 111.8         | -1.1         | 110.9      | -2.0         |
| N13-C7-C14             | <b>112.8</b>  | 116.0         | 3.1          | 116.3      | 3.4          |
| N13-C7-C4              | <b>110.2</b>  | 109.7         | -0.6         | 109.8      | -0.5         |
| C14-C7-C4              | <b>111.6</b>  | 110.9         | -0.7         | 110.2      | -1.4         |
| C7-C14-C15             | <b>121.6</b>  | 122.4         | 0.8          | 122.2      | 0.6          |
| C7-N13-H26             | <b>120.1</b>  | 123.6         | 3.4          | 121.3      | 1.1          |
| C8-C7-N13              | <b>101.4</b>  | 103.9         | 2.5          | 102.7      | 1.3          |
| <b>Dihedral angles</b> |               |               |              |            |              |
| C2-C3-C4-C7            | <b>-175.5</b> | -178.2        | -2.7         | -177.5     | -2.0         |
| C3-C4-C7-C8            | <b>-170.6</b> | -167.6        | 3.0          | -173.2     | -2.5         |
| C4-C7-C8-N10           | <b>-113.6</b> | -119.0        | -5.4         | -120.0     | -6.5         |
| C7-C8-N10-C11          | <b>2.0</b>    | 2.4           | 0.4          | 6.7        | 4.7          |
| C8-N10-C11-N13         | <b>-7.5</b>   | -2.6          | 4.9          | -8.3       | -0.8         |
| N10-C11-N13-C7         | <b>10.3</b>   | 1.5           | -8.7         | 6.2        | -4.1         |
| C11-N13-C7-C14         | <b>-124.6</b> | -115.0        | 9.7          | -117.4     | 7.2          |
| N13-C7-C14-C15         | <b>2.8</b>    | 3.4           | 0.6          | -3.3       | -6.1         |
| C7-C14-C15-C16         | <b>179.7</b>  | -178.4        | 1.9          | -178.5     | 1.8          |
| O9-C8-N10-H25          | <b>0.2</b>    | 0.2           | 0.0          | -2.6       | -2.8         |
| H25-N10-C11-O12        | <b>-4.6</b>   | 1.1           | 5.7          | 0.9        | 5.5          |
| O12-C11-N13-H26        | <b>-24.8</b>  | -1.8          | 23.0         | -26.5      | -1.7         |
| C11-N13-C7-C8          | <b>-8.9</b>   | -0.2          | 8.7          | -2.3       | 6.6          |
| N13-C7-C8-N10          | <b>3.9</b>    | -1.2          | -5.1         | -2.4       | -6.4         |

See legend for Table S8.

**Table SA10.** BZC vibrational frequencies along with MOLVIB assignments

| #  | Scaled MP2/6-31G(d) |          | new  |          | PED | new    | PED      | new | PED      | new | PED    | new      | PED | new      | PED |          |    |
|----|---------------------|----------|------|----------|-----|--------|----------|-----|----------|-----|--------|----------|-----|----------|-----|----------|----|
|    | Freq                | PED      | Freq | PED      |     |        |          |     |          |     |        |          |     |          |     |          |    |
| 1  | 35.3                | torC3-C4 | 70   | torC2-O1 | 24  | 40.3   | torC3-C4 | 68  | torC2-O1 | 19  | 88.4   | torO1-C3 | 32  | wC4H     | 29  | ta6RNG1a | 15 |
| 2  | 72.5                | torC2-O1 | 68   | torC3-C4 | 29  | 88.4   | torO1-C3 | 32  | wC4H     | 29  | 93.8   | torC2-O1 | 78  | torC3-C4 | 21  | dC4H     | 22 |
| 3  | 76.3                | wC4H     | 40   | torO1-C3 | 25  | 93.8   | torC2-O1 | 78  | torC3-C4 | 21  | 110.0  | iO1      | 31  | dO1C3C4  | 29  | dC4H     | 22 |
| 4  | 98.8                | dO1C3C4  | 35   | dC4H     | 27  | 110.0  | iO1      | 31  | dO1C3C4  | 29  | 149.0  | torO1-C3 | 45  | ta6RNG1a | 26  |          |    |
| 5  | 137.9               | torO1-C3 | 54   | ta6RNG1a | 28  | 149.0  | torO1-C3 | 45  | ta6RNG1a | 26  | 237.1  | dC4H     | 31  |          |     |          |    |
| 6  | 238.3               | dC4H     | 36   | iO1      | 20  | 237.1  | dC4H     | 31  |          |     | 262.1  | torC1-C2 | 85  |          |     |          |    |
| 7  | 254.5               | torC1-C2 | 64   |          |     | 262.1  | torC1-C2 | 85  |          |     | 270.6  | torN1-C7 | 86  |          |     |          |    |
| 8  | 273.3               | torN1-C7 | 99   |          |     | 270.6  | torN1-C7 | 86  |          |     | 294.4  | iO1      | 33  | sC4-C3   | 18  |          |    |
| 9  | 283.1               | torC1-C2 | 27   | wC4H     | 26  | 294.4  | iO1      | 33  | sC4-C3   | 18  | 308.3  | wC7H     | 42  | wC4H     | 23  |          |    |
| 10 | 296.4               | sC4-C3   | 22   | da6RNG1a | 21  | 308.3  | wC7H     | 42  | wC4H     | 23  | 373.9  | dC7H     | 25  | dC3O     | 19  |          |    |
| 11 | 359.7               | dC7H     | 36   | dC3O     | 21  | 373.9  | dC7H     | 25  | dC3O     | 19  | 388.8  | dC7H     | 34  | dC2CO    | 28  |          |    |
| 12 | 371.0               | ta6RNG1  | 79   | ta6RNG1a | 29  | 388.8  | dC7H     | 34  | dC2CO    | 28  | 423.3  | ta6RNG1  | 85  | ta6RNG1a | 30  |          |    |
| 13 | 372.8               | dC2CO    | 32   | dC7H     | 27  | 423.3  | ta6RNG1  | 85  | ta6RNG1a | 30  | 477.3  | dO1C3C4  | 27  | dC2CO    | 24  |          |    |
| 14 | 415.4               | tp6RNG1  | 80   |          |     | 477.3  | dO1C3C4  | 27  | dC2CO    | 24  | 484.3  | ta6RNG1a | 34  | wC7H     | 23  |          |    |
| 15 | 479.2               | dO1C3C4  | 34   | dC4H     | 16  | 484.3  | ta6RNG1a | 34  | wC7H     | 23  | 574.9  | sC7-N1   | 20  | dt6RNG1  | 17  |          |    |
| 16 | 481.0               | wC7H     | 75   |          |     | 574.9  | sC7-N1   | 20  | dt6RNG1  | 17  | 642.8  | tp6RNG1  | 89  |          |     |          |    |
| 17 | 592.8               | da6RNG1a | 24   | dC3O     | 18  | 642.8  | tp6RNG1  | 89  |          |     | 687.9  | da6RNG1  | 60  | da6RNG1a | 18  |          |    |
| 18 | 617.8               | da6RNG1  | 60   | da6RNG1a | 16  | 687.9  | da6RNG1  | 60  | da6RNG1a | 18  | 713.9  | wN1C7    | 65  |          |     |          |    |
| 19 | 648.0               | wN1C7    | 78   |          |     | 713.9  | wN1C7    | 65  |          |     | 794.1  | wC3O2    | 50  |          |     |          |    |
| 20 | 677.6               | wC3O2    | 75   |          |     | 794.1  | wC3O2    | 50  |          |     | 821.3  |          |     |          |     |          |    |
| 21 | 742.1               | wC8H     | 44   | wC6H     | 22  | 821.3  |          |     |          |     | 854.1  | wC8H     | 34  | wC9H     | 32  | wC6H     | 16 |
| 22 | 759.5               | wC6H     | 56   | wC8H     | 27  | 854.1  | wC8H     | 34  | wC9H     | 32  | 856.4  | wC6H     | 26  | wC5H     | 21  | rC2H     | 16 |
| 23 | 785.2               | dt6RNG1  | 19   |          |     | 856.4  | wC6H     | 26  | wC5H     | 21  | 869.6  | sO1-C3   | 22  |          |     |          |    |
| 24 | 790.8               | rC1H'    | 43   | rC2H     | 42  | 869.6  | sO1-C3   | 22  |          |     | 873.8  | rC2H     | 38  | rC1H'    | 25  |          |    |
| 25 | 818.2               | wC9H     | 82   | wC8H     | 27  | 873.8  | rC2H     | 38  | rC1H'    | 25  | 926.9  | sO1-C3   | 34  | rC1H     | 34  |          |    |
| 26 | 828.9               |          |      |          |     | 926.9  | sO1-C3   | 34  | rC1H     | 34  | 959.7  | wC9H     | 27  | wC5H     | 25  | wC8H     | 24 |
| 27 | 835.2               | wC5H     | 89   | wC6H     | 19  | 959.7  | wC9H     | 27  | wC5H     | 25  | 962.7  | dt6RNG1  | 36  |          |     |          |    |
| 28 | 869.2               | sC2-O1   | 38   | rC1H     | 25  | 962.7  | dt6RNG1  | 36  |          |     | 994.0  | wC5H     | 19  | wC6H     | 18  | wC9H     | 17 |
| 29 | 984.4               | dt6RNG1  | 48   |          |     | 994.0  | wC5H     | 19  | wC6H     | 18  | 995.6  |          |     |          |     |          |    |
| 30 | 1020.5              | sC1-C2   | 40   | sC2-O1   | 25  | 995.6  |          |     |          |     | 1014.4 | dN1C7    | 54  |          |     |          |    |
| 31 | 1055.8              | dN1C7    | 46   |          |     | 1014.4 | dN1C7    | 54  |          |     | 1048.4 | sC1-C2   | 60  |          |     |          |    |
| 32 | 1097.4              | sO1-C3   | 25   | sC2-O1   | 24  | 1048.4 | sC1-C2   | 60  |          |     | 1066.8 | rC1H'    | 59  | rC2H     | 35  |          |    |
| 33 | 1107.0              | rC1H     | 40   | sC1-C2   | 25  | 1066.8 | rC1H'    | 59  | rC2H     | 35  | 1110.6 | sC2-O1   | 34  | rC1H     | 26  |          |    |
| 34 | 1116.1              | dN1C7    | 21   | dC6H     | 19  | 1110.6 | sC2-O1   | 34  | rC1H     | 26  | 1126.1 | sC8-C9   | 34  | sC5-C6   | 17  |          |    |
| 35 | 1151.2              | rC2H     | 55   | rC1H'    | 30  | 1126.1 | sC8-C9   | 34  | sC5-C6   | 17  | 1176.1 | sC5-C6   | 33  | sC8-C9   | 21  |          |    |
| 36 | 1161.3              | dC8H     | 24   | dC9H     | 21  | 1176.1 | sC5-C6   | 33  | sC8-C9   | 21  | 1269.8 | sC4-C3   | 22  |          |     |          |    |
| 37 | 1250.3              | iC2H     | 78   | rC1H'    | 19  | 1269.8 | sC4-C3   | 22  |          |     | 1284.0 | sC7-N1   | 21  | dC8H     | 15  |          |    |
| 38 | 1262.0              | sC4-C3   | 26   | sO1-C3   | 21  | 1284.0 | sC7-N1   | 21  | dC8H     | 15  | 1315.3 | iC2H     | 93  |          |     |          |    |
| 39 | 1266.5              | sC7-N1   | 48   |          |     | 1315.3 | iC2H     | 93  |          |     | 1362.4 | dC5H     | 22  |          |     |          |    |
| 40 | 1284.6              | dC9H     | 27   | dC5H     | 25  | 1362.4 | dC5H     | 22  |          |     | 1397.2 |          |     |          |     |          |    |
| 41 | 1355.2              | wC2H     | 58   | dsC1H    | 25  | 1397.2 |          |     |          |     | 1406.9 | dsC1H    | 94  |          |     |          |    |
| 42 | 1384.4              | sC9-C4   | 20   | sC4-C5   | 19  | 1406.9 | dsC1H    | 94  |          |     | 1418.2 | cC2-H    | 55  | wC2H     | 27  |          |    |
| 43 | 1396.7              | dsC1H    | 69   | wC2H     | 17  | 1418.2 | cC2-H    | 55  | wC2H     | 27  | 1429.0 | daC1H    | 83  |          |     |          |    |
| 44 | 1423.4              | sC5-C6   | 32   | sC8-C9   | 30  | 1429.0 | daC1H    | 83  |          |     |        |          |     |          |     |          |    |

**new** results are from calculations using optimized CHARMM force field parameters used in this study All frequencies (freq) are in  $\text{cm}^{-1}$  and MOLVIB assignments using potential energy decomposition (PED) are in %. Definition of various independent internal coordinates can be found in (56).

**Table SA10 (continued).** BZC vibrational frequencies along with MOLVIB assignments

| #  | Scaled MP2/6-31G(d) |        |     | new    |        |     |        |  |  |    |
|----|---------------------|--------|-----|--------|--------|-----|--------|--|--|----|
|    | Freq                | PED    |     | Freq   | PED    |     |        |  |  |    |
| 45 | 1463.2              | daC1H' | 93  | 1429.5 | daC1H' | 91  |        |  |  |    |
| 46 | 1473.4              | daC1H  | 72  | 1446.6 | sC8-C9 | 16  | sC5-C6 |  |  | 16 |
| 47 | 1489.8              | cC2-H  | 69  | 1464.2 | dN1H10 | 65  |        |  |  |    |
| 48 | 1496.0              |        |     | 1478.9 | dC9H   | 18  |        |  |  |    |
| 49 | 1566.2              | sC6-C7 | 20  | 1517.8 | dC5H   | 27  | dC9H   |  |  | 24 |
| 50 | 1598.9              | dN1H10 | 29  | 1557.7 | wC2H   | 45  | cC2-H  |  |  | 38 |
| 51 | 1620.6              | dN1H10 | 67  | 1583.0 | sC7-N1 | 27  |        |  |  |    |
| 52 | 1702.3              | sC3-O2 | 83  | 1757.2 | sC3-O2 | 83  |        |  |  |    |
| 53 | 2941.3              | sC1-H  | 100 | 2854.9 | sC2-H  | 98  |        |  |  |    |
| 54 | 2951.6              | sC2-H  | 100 | 2892.0 | sC2-H  | 99  |        |  |  |    |
| 55 | 3003.5              | sC2-H  | 92  | 2902.3 | sC1-H  | 98  |        |  |  |    |
| 56 | 3026.7              | sC1-H  | 100 | 2959.4 | sC1-H  | 100 |        |  |  |    |
| 57 | 3032.6              | sC8-H8 | 97  | 2959.8 | sC1-H  | 99  |        |  |  |    |
| 58 | 3033.2              | sC6-H7 | 95  | 3054.0 | sC9-H9 | 58  | sC5-H6 |  |  | 34 |
| 59 | 3039.1              | sC1-H  | 93  | 3055.9 | sC5-H6 | 49  | sC9-H9 |  |  | 31 |
| 60 | 3066.1              | sC5-H6 | 95  | 3057.2 | sC6-H7 | 49  | sC8-H8 |  |  | 41 |
| 61 | 3074.8              | sC9-H9 | 97  | 3060.2 | sC6-H7 | 40  | sC8-H8 |  |  | 40 |
| 62 | 3367.4              | sN1-H  | 100 | 3459.5 | sN1-H  | 100 |        |  |  |    |
| 63 | 3472.3              | sN1-H  | 100 | 3541.2 | sN1-H  | 100 |        |  |  |    |

**new** results are from calculations using optimized CHARMM force field parameters used in this study All frequencies (freq) are in  $\text{cm}^{-1}$  and MOLVIB assignments using potential energy decomposition (PED) are in %. Definition of various independent internal coordinates can be found in (56).

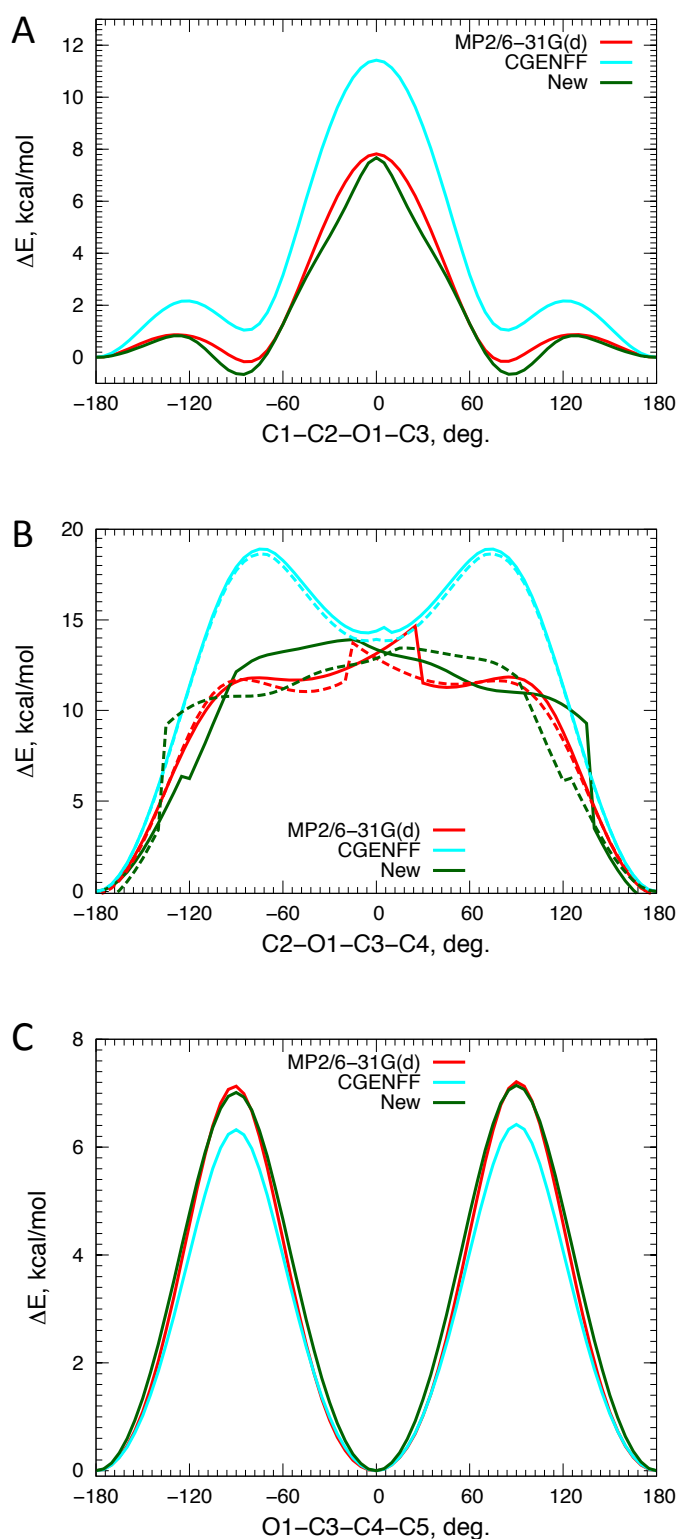

**Figure SA1.** BZC relaxed dihedral potential energy scans for (A) C1-C2-O1-C3, (B) C2-O1-C3-C4, (C) O1-C3-C4-C5 dihedral angles. Other internal degrees of freedom were allowed to relax. MP2/6-31G(d) scans are shown by red lines, CHARMM scans using parameters generated by the CGENFF program (version 0.9.7 beta) as cyan lines, and CHARMM scans using optimized parameters (new) by dark-green lines. Scans in the forward direction (from  $-180^\circ$  to  $180^\circ$ ) are shown as solid lines, whereas those in the backward direction (from  $180^\circ$  to  $-180^\circ$ ) are shown as dashed lines.

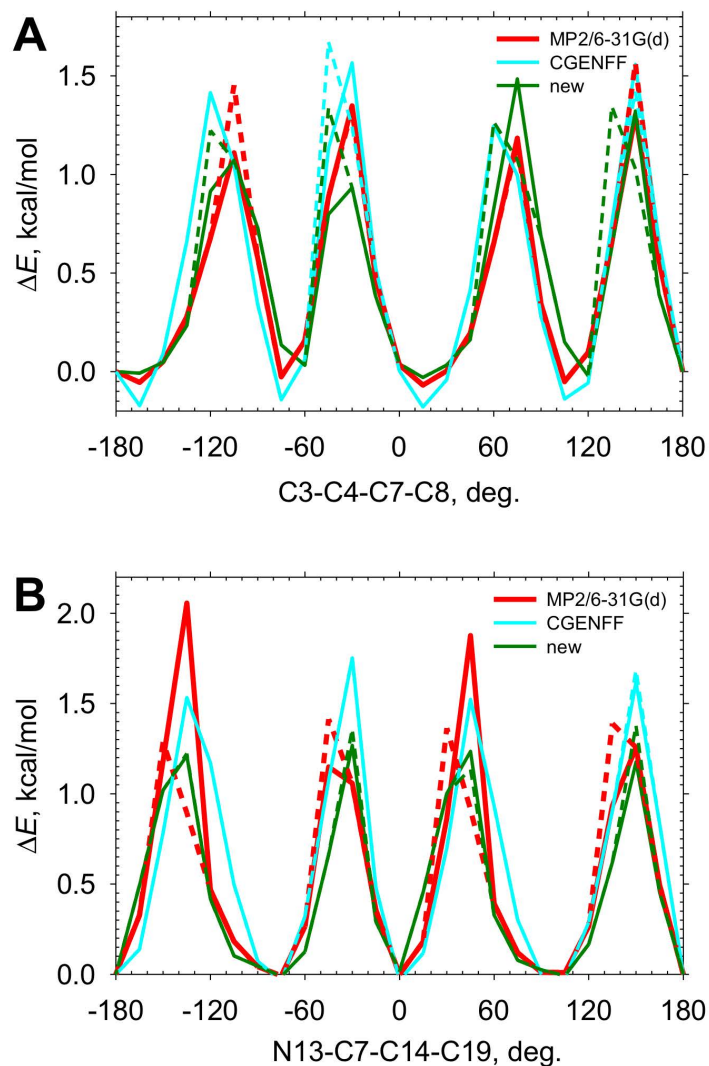

**Figure SA2.** PHT relaxed dihedral potential energy scans for (A) C3–C4–C7–C8, (B) N13–C7–C14–C19 dihedral angles. Other internal degrees of freedom were allowed to relax. MP2/6-31G(d) scans are shown as red lines, CHARMM scans using parameters generated by the CGENFF program (version 0.9.7 beta) as cyan lines, and CHARMM scans using optimized parameters (new) as dark-green lines. Scans in the forward direction (from  $-180^\circ$  to  $180^\circ$ ) are shown as solid lines, whereas those in the backward direction (from  $180^\circ$  to  $-180^\circ$ ) are shown as dashed lines.



## Appendix SA2. Topology and parameters for BZC

```
* Toppar stream file generated by
* CHARMM General Force Field (CGenFF) program version 0.9.7 beta
* and modified by Igor Vorobyov, Sept. 2013
*

read rtf card ! append
* Topologies generated by
* CHARMM General Force Field (CGenFF) program version 0.9.7 beta
* and modified by Igor Vorobyov, Sept. 2013
*
36 1

MASS 257 HGA2 1.00800 ! alphatic proton, CH2
MASS 258 HGA3 1.00800 ! alphatic proton, CH3
MASS 269 HGP4 1.00800 ! polar H, neutral conjugated -NH2 group (NA bases)
MASS 277 HGR6 1.00800 ! aromatic H
MASS 294 CGCA 12.01100 ! carbonyl C: esters, [neutral] carboxylic acids
MASS 304 CGR6 12.01100 ! 6-mem aromatic C
MASS 318 CG32 12.01100 ! aliphatic C for CH2
MASS 322 CG33 12.01100 ! aliphatic C for methyl group (-CH3)
MASS 341 NGAM 14.00700 ! external amine ring nitrogen (planar/aniline), phosphoramidate
MASS 375 OGES 15.99940 ! ester -O-
MASS 365 OGCA 15.99940 ! carbonyl O: amides, esters, [neutral] carboxylic acids, aldehydes,
uera

RESI BNZC 0.000 !
GROUP ! CHARGE
ATOM C1 CG33 -0.269 !
ATOM C2 CG32 0.060 !
ATOM O1 OGES -0.307 !
ATOM C3 CGCA 0.466 !
ATOM O2 OGCA -0.494 !
ATOM C4 CGR6 0.086 !
ATOM C5 CGR6 -0.140 !
ATOM C6 CGR6 -0.140 !
ATOM C7 CGR6 0.168 !
ATOM C8 CGR6 -0.140 !
ATOM C9 CGR6 -0.140 !
ATOM N1 NGAM -0.742 !
ATOM H1 HGA3 0.090 !
ATOM H2 HGA3 0.090 !
ATOM H3 HGA3 0.090 !
ATOM H4 HGA2 0.090 !
ATOM H5 HGA2 0.090 !
ATOM H6 HGR6 0.115 !
ATOM H7 HGR6 0.115 !
ATOM H8 HGR6 0.115 !
ATOM H9 HGR6 0.115 !
ATOM H10 HGP4 0.341 !
ATOM H11 HGP4 0.341 !

BOND C1 C2
BOND C1 H1
BOND C1 H2
BOND C1 H3
BOND C2 O1
BOND C2 H4
BOND C2 H5
BOND O1 C3
BOND C3 O2
BOND C3 C4
BOND C4 C9
BOND C4 C5
BOND C5 C6
BOND C5 H6
BOND C6 C7
BOND C6 H7
BOND C7 C8
BOND C7 N1
BOND C8 C9
BOND C8 H8
BOND C9 H9
```

BOND N1 H10  
BOND N1 H11  
IMPR C3 C4 O2 O1  
IMPR N1 H11 H10 C7

auto angle dihe

END

read param card flex ! append

\* Parameters generated by analogy by

\* CHARMM General Force Field (CGenFF) program version 0.9.7 beta

\* and modified by Igor Vorobyov, September 2013

\*

#### ATOMS

MASS 257 HGA2 1.00800 ! alphatic proton, CH2  
MASS 258 HGA3 1.00800 ! alphatic proton, CH3  
MASS 269 HGP4 1.00800 ! polar H, neutral conjugated -NH2 group (NA bases)  
MASS 277 HGR6 1.00800 ! aromatic H  
MASS 294 CGCA 12.01100 ! carbonyl C: esters, [neutral] carboxylic acids  
MASS 304 CGR6 12.01100 ! 6-mem aromatic C  
MASS 318 CG32 12.01100 ! aliphatic C for CH2  
MASS 322 CG33 12.01100 ! aliphatic C for methyl group (-CH3)  
MASS 341 NGAM 14.00700 ! external amine ring nitrogen (planar/aniline), phosphoramidate  
MASS 375 OGES 15.99940 ! ester -O-  
MASS 365 OGCA 15.99940 ! carbonyl O: amides, esters, [neutral] carboxylic acids, aldehydes, uera

#### BONDS

CGCA CGR6 254.00 1.4800 ! ZOIC, benzoic acid, MBOA, methylbenzoate, jal  
CGCA OGCA 750.00 1.2200 ! PROT adm jr. 5/02/91, acetic acid pure solvent; LIPID methyl acetate  
CGCA OGES 150.00 1.3340 ! LIPID methyl acetate  
CGR6 CGR6 305.00 1.3750 ! PROT benzene, JES 8/25/89  
CGR6 NGAM 400.00 1.3900 ! PYRIDINE aminopyridine, adm jr., 7/94  
CGR6 HGR6 340.00 1.0800 ! PROT phe,tyr JES 8/25/89  
CG32 CG33 222.50 1.5280 ! PROT alkane update, adm jr., 3/2/92  
CG32 OGES 320.00 1.4400 ! PROTNA serine/threonine phosphate  
CG32 HGA2 309.00 1.1110 ! PROT alkane update, adm jr., 3/2/92  
CG33 HGA3 322.00 1.1110 ! PROT alkane update, adm jr., 3/2/92  
NGAM HGP4 488.00 1.0160 ! viv 09/13

#### ANGLES

CGR6 CGCA OGCA 70.00 125.10 20.00 2.44200 ! viv 09/13  
CGR6 CGCA OGES 50.00 111.00 20.00 2.36000 ! MBOA, methylbenzoate, jal  
OGCA CGCA OGES 90.00 125.90 160.00 2.25760 ! LIPID acetic acid  
CGCA CGR6 CGR6 45.00 120.00 ! ZOIC, benzoic acid, MBOA, methylbenzoate, jal  
CGR6 CGR6 CGR6 40.00 120.00 35.00 2.41620 ! PROT JES 8/25/89  
CGR6 CGR6 NGAM 45.00 121.00 ! viv 09/13  
CGR6 CGR6 HGR6 30.00 120.00 22.00 2.15250 ! PROT JES 8/25/89 benzene  
CG33 CG32 OGES 75.70 108.70 ! viv 09/13  
CG33 CG32 HGA2 34.60 110.10 22.53 2.17900 ! PROT alkane update, adm jr., 3/2/92  
OGES CG32 HGA2 60.00 109.50 ! PROT adm jr. 4/05/91, methyl acetate  
HGA2 CG32 HGA2 35.50 109.00 5.40 1.80200 ! PROT alkane update, adm jr., 3/2/92  
CG32 CG33 HGA3 34.60 110.10 22.53 2.17900 ! PROT alkane update, adm jr., 3/2/92  
HGA3 CG33 HGA3 35.50 108.40 5.40 1.80200 ! PROT alkane update, adm jr., 3/2/92  
CGR6 NGAM HGP4 42.00 113.60 ! viv 09/13  
HGP4 NGAM HGP4 31.00 107.50 ! viv 09/13  
CGCA OGES CG32 40.00 113.00 30.00 2.26510 ! viv 09/13

#### DIHEDRALS

OGCA CGCA CGR6 CGR6 1.1500 2 180.00 ! viv 09/13  
OGES CGCA CGR6 CGR6 0.9500 2 180.00 ! viv 09/13  
CGR6 CGCA OGES CG32 1.2500 1 180.00 ! ZINC12 , from CGR6 CGCA OGES CG33, PENALTY= 0.9  
CGR6 CGCA OGES CG32 1.5000 2 180.00 ! ZINC12 , from CGR6 CGCA OGES CG33, PENALTY= 0.9  
CGR6 CGCA OGES CG32 0.0500 6 180.00 ! ZINC12 , from CGR6 CGCA OGES CG33, PENALTY= 0.9  
OGCA CGCA OGES CG32 0.9650 1 180.00 ! LIPID methyl acetate  
OGCA CGCA OGES CG32 3.8500 2 180.00 ! LIPID methyl acetate  
CGCA CGR6 CGR6 CGR6 3.1000 2 180.00 ! ZOIC, benzoic acid, MBOA, methylbenzoate; default parameter; kevo & jal  
CGCA CGR6 CGR6 HGR6 2.4000 2 180.00 ! ZOIC, benzoic acid, MBOA, methylbenzoate; default parameter; kevo & jal  
CGR6 CGR6 CGR6 CGR6 3.1000 2 180.00 ! PROT JES 8/25/89

```

CGR6 CGR6 CGR6 NGAM      5.0000  2  180.00 ! PYRIDINE aminopyridine, yin
CGR6 CGR6 CGR6 HGR6     4.2000  2  180.00 ! PROT JES 8/25/89 benzene
NGAM  CGR6 CGR6 HGR6     2.4000  2  180.00 ! PYRIDINE aminopyridine Kenno: 4.2 -> 2.4
HGR6  CGR6 CGR6 HGR6     2.4000  2  180.00 ! PROT JES 8/25/89 benzene
CGR6  CGR6 NGAM  HGP4     1.1700  2  180.00 ! viv 09/13
OGES  CG32  CG33  HGA3     0.1950  3     0.00 ! PROT alkane update, adm jr., 3/2/92
HGA2  CG32  CG33  HGA3     0.1600  3     0.00 ! PROT rotation barrier in Ethane (SF)
CG33  CG32  OGES  CGCA     0.0014  1     0.00 ! viv 09/13 MP2/6-31G(d) fit
CG33  CG32  OGES  CGCA     3.0430  2  180.00 ! viv 09/13 MP2/6-31G(d) fit
CG33  CG32  OGES  CGCA     1.8598  3  180.00 ! viv 09/13 MP2/6-31G(d) fit
CG33  CG32  OGES  CGCA     0.7461  4  180.00 ! viv 09/13 MP2/6-31G(d) fit
HGA2  CG32  OGES  CGCA     1.0865  1     0.00 ! viv 09/13 MP2/6-31G(d) fit
HGA2  CG32  OGES  CGCA     2.9983  2  180.00 ! viv 09/13 MP2/6-31G(d) fit
HGA2  CG32  OGES  CGCA     0.8517  3     0.00 ! viv 09/13 MP2/6-31G(d) fit
HGA2  CG32  OGES  CGCA     0.8641  4  180.00 ! viv 09/13 MP2/6-31G(d) fit

IMPROPERS
CGCA  CGR6  OGCA  OGES      72.0000  0     0.00 ! MBOA, methyl benzoate; MOLVIB looks good; jal
NGAM  HGP4   HGP4   CGR6     -2.5000  0     0.00 ! -2.0 PYRIDINE aminopyridine 11/10 kevo: sic!
Compensates for in-plane force from CGR6 CGR6 NGAM HGP4

NONBONDED nbxmod  5 atom cdiel fshift vatom vdistance vfswitch -
cutnb 14.0 ctofnb 12.0 ctonnb 10.0 eps 1.0 e14fac 1.0 wmin 1.5
!see mass list above for better description of atom types
HGA2   0.0      -0.0350      1.3400 ! alkane, igor, 6/05
HGA3   0.0      -0.0240      1.3400 ! alkane, yin and mackerell, 4/98
HGR6   0.0      -0.0300      1.3582 ! benzene
HGP4   0.0      -0.0460      0.2245 ! polar H, conjugated amines (NA bases)
CGCA   0.0      -0.0980      1.7000 ! methyl acetate update viv 12/29/06
CGR6   0.0      -0.0700      1.9924 ! INDO/TRP
CG32   0.0      -0.0560      2.0100  0.0 -0.01 1.9 ! alkane (CT2), 4/98, yin, adm jr, also used by
viv
CG33   0.0      -0.0780      2.0500  0.0 -0.01 1.9 ! alkane (CT3), 4/98, yin, adm jr; Rmin/2
modified from 2.04 to 2.05
NGAM   0.0      -0.2000      1.8500 ! PROT
OGES   0.0      -0.1000      1.6500 ! ester; LJ from THP, sng 1/06
OGCA   0.0      -0.1200      1.7000  0.0 -0.12 1.40 ! carbonyl. Also consistent with adm,
acetaldehyde, 11/08
END

```

## Appendix SA3. Topology and parameters for PHT

```
* Toppar stream file generated by
* CHARMM General Force Field (CGenFF) program version 0.9.7 beta
* and modified by I. Vorobyov, September 2013
*

read rtf card flex ! append
* Topologies generated by
* CHARMM General Force Field (CGenFF) program version 0.9.7 beta
*
36 1

MASS 266 HGP1 1.00800 ! polar H
MASS 277 HGR61 1.00800 ! aromatic H
MASS 302 CG2R53 12.01100 ! 5-mem ring, double bound to N and adjacent to another heteroatom,
purine C8, his CE1 (0,+1), 2PDO, kevo
MASS 304 CG2R61 12.01100 ! 6-mem aromatic C
MASS 329 CG3C50 12.01100 ! 5-mem ring aliphatic quaternary C (cholesterol, bile acids)
MASS 365 OG2D1 15.99940 ! carbonyl O: amides, esters, [neutral] carboxylic acids, aldehydes,
urea
MASS 349 NG2R53 14.00700 ! amide in 5-memebered NON-SP2 ring (slightly pyramidized), 2PDO, kevo

auto angle dihe

RESI PHT1 0.000
GROUP ! CHARGE
ATOM C1 CG2R61 -0.115
ATOM C2 CG2R61 -0.110 !
ATOM C3 CG2R61 -0.155 !
ATOM C4 CG2R61 0.121 !
ATOM C5 CG2R61 -0.155 !
ATOM C6 CG2R61 -0.110 !
ATOM C7 CG3C50 0.160 !
ATOM C8 CG2R53 0.513 !
ATOM O9 OG2D1 -0.470 !
ATOM N10 NG2R53 -0.500 !
ATOM C11 CG2R53 0.490 !
ATOM O12 OG2D1 -0.450 !
ATOM N13 NG2R53 -0.560 !
ATOM C14 CG2R61 0.120 !
ATOM C15 CG2R61 -0.155 !
ATOM C16 CG2R61 -0.110 !
ATOM C17 CG2R61 -0.115 !
ATOM C18 CG2R61 -0.110 !
ATOM C19 CG2R61 -0.155 !
ATOM H20 HGR61 0.115 !
ATOM H21 HGR61 0.115 !
ATOM H22 HGR61 0.115 !
ATOM H23 HGR61 0.115 !
ATOM H24 HGR61 0.115 !
ATOM H25 HGP1 0.372 !
ATOM H26 HGP1 0.344 !
ATOM H27 HGR61 0.115 !
ATOM H28 HGR61 0.115 !
ATOM H29 HGR61 0.115 !
ATOM H30 HGR61 0.115 !
ATOM H31 HGR61 0.115 !

BOND C1 C6
BOND C1 C2
BOND C1 H20
BOND C2 C3
BOND C2 H21
BOND C3 C4
BOND C3 H22
BOND C4 C5
BOND C4 C7
BOND C5 C6
BOND C5 H23
BOND C6 H24
BOND C7 N13
```

```

BOND C7 C8
BOND C7 C14
BOND C8 O9
BOND C8 N10
BOND N10 C11
BOND N10 H25
BOND C11 O12
BOND C11 N13
BOND N13 H26
BOND C14 C19
BOND C14 C15
BOND C15 C16
BOND C15 H27
BOND C16 C17
BOND C16 H28
BOND C17 C18
BOND C17 H29
BOND C18 C19
BOND C18 H30
BOND C19 H31
IMPR C8 C7 N10 O9
IMPR C11 N10 N13 O12

```

END

```

read param card flex ! append
* Parameters generated by analogy by
* CHARMM General Force Field (CGenFF) program version 0.9.7 beta
* and modified by I. Vorobyov, September 2013
*

```

#### ATOMS

```

MASS 266 HGP1 1.00800 ! polar H
MASS 277 HGR61 1.00800 ! aromatic H
MASS 302 CG2R53 12.01100 ! 5-mem ring, double bound to N and adjacent to another heteroatom,
purine C8, his CE1 (0,+1), 2PDO, kevo
MASS 304 CG2R61 12.01100 ! 6-mem aromatic C
MASS 329 CG3C50 12.01100 ! 5-mem ring aliphatic quaternary C (cholesterol, bile acids)
MASS 365 OG2D1 15.99940 ! carbonyl O: amides, esters, [neutral] carboxylic acids, aldehydes,
urea
MASS 349 NG2R53 14.00700 ! amide in 5-memembered NON-SP2 ring (slightly pyramidized), 2PDO, kevo
validation/optimization.

```

#### BONDS

```

CG2R53 CG3C50 300.00 1.5300 ! Molecu , from CG2R53 CG3C52, PENALTY= 10 ! viv 09/13 ok
CG2R53 NG2R53 460.00 1.3800 !460 370 *NEW* 2PDO, 2-pyrrolidinone, kevo
CG2R53 OG2D1 570.00 1.2350 !560 620 *NEW* 2PDO, 2-pyrrolidinone, kevo
CG2R61 CG2R61 305.00 1.3750 ! PROT benzene, JES 8/25/89
CG2R61 CG3C50 230.00 1.4500 ! viv 09/13
CG2R61 HGR61 340.00 1.0800 ! PROT phe,tyr JES 8/25/89
CG3C50 NG2R53 370.00 1.4500 ! Molecu , from CG3C52 NG2R53, PENALTY= 10 ! viv 09/13 ok
NG2R53 HGP1 470.00 1.0150 !470 440 *NEW* 2PDO, 2-pyrrolidinone, kevo

```

#### ANGLES

```

CG3C50 CG2R53 NG2R53 95.00 109.80 ! viv 09/13
CG3C50 CG2R53 OG2D1 65.00 122.30 ! viv 09/13
NG2R53 CG2R53 NG2R53 75.00 104.40 ! MHYO, 5-methylenehydantoin, xxwy
NG2R53 CG2R53 OG2D1 65.00 127.80 ! 2PDO, 2-pyrrolidinone, kevo
CG2R61 CG2R61 CG2R61 40.00 120.00 35.00 2.41620 ! PROT JES 8/25/89
CG2R61 CG2R61 CG3C50 45.80 120.00 ! Molecu , from CG2R61 CG2R61 CG321, PENALTY= 10
CG2R61 CG2R61 HGR61 30.00 120.00 22.00 2.15250 ! PROT JES 8/25/89 benzene
CG2R53 CG3C50 CG2R61 62.00 104.20 ! viv 09/13
CG2R53 CG3C50 NG2R53 105.00 110.30 ! viv 09/13
CG2R61 CG3C50 CG2R61 51.80 106.00 ! viv 09/13
CG2R61 CG3C50 NG2R53 52.00 108.30 ! viv 09/13
CG2R53 NG2R53 CG2R53 55.00 113.50 ! MRDN, methylidene rhodanine, kevo & xxwy
CG2R53 NG2R53 CG3C50 55.00 113.50 ! viv 09/13
CG2R53 NG2R53 HGP1 38.00 119.50 ! 2PDO, 2-pyrrolidinone (H1-N1-C2), kevo
CG3C50 NG2R53 HGP1 38.00 116.00 ! Molecu , from CG3C52 NG2R53 HGP1, PENALTY= 1.2

```

#### DIHEDRALS

```

NG2R53 CG2R53 CG3C50 CG2R61 3.5000 3 180.00 ! Molecu , from NG2R50 CG2R52 CG3C52 CG2RC0,
PENALTY= 79.5
NG2R53 CG2R53 CG3C50 NG2R53 1.0500 3 180.00 ! Molecu , from NG2R53 CG2R53 CG3C52 CG3C52,
PENALTY= 82

```

OG2D1 CG2R53 CG3C50 CG2R61 0.0800 3 0.00 ! Molecu , from OG2D1 CG2R53 CG3C52 CG3C52,  
 PENALTY= 104  
 OG2D1 CG2R53 CG3C50 NG2R53 0.0800 3 0.00 ! Molecu , from OG2D1 CG2R53 CG3C52 CG3C52,  
 PENALTY= 82  
 CG3C50 CG2R53 NG2R53 CG2R53 0.5000 2 180.00 ! Molecu , from NG2R53 CG2R53 NG2R53 CG2R53,  
 PENALTY= 87.5  
 CG3C50 CG2R53 NG2R53 HGP1 3.5000 2 180.00 ! viv 09/13  
 NG2R53 CG2R53 NG2R53 CG2R53 0.5000 2 180.00 ! MHYO, 5-methylenehydantoin, xxwy  
 NG2R53 CG2R53 NG2R53 CG3C50 0.5000 2 180.00 ! Molecu , from NG2R53 CG2R53 NG2R53 CG311,  
 PENALTY= 30.6  
 NG2R53 CG2R53 NG2R53 HGP1 0.8000 2 180.00 ! MHYO, 5-methylenehydantoin, xxwy  
 OG2D1 CG2R53 NG2R53 CG2R53 1.1000 2 180.00 ! MRDN, methylidene rhodanine, kevo & xxwy  
 OG2D1 CG2R53 NG2R53 CG3C50 2.5900 2 180.00 ! Molecu , from OG2D1 CG2R53 NG2R53 CG3C52,  
 PENALTY= 1.2  
 OG2D1 CG2R53 NG2R53 HGP1 0.8600 2 180.00 ! 2PDO, 2-pyrrolidinone, kevo  
 CG2R61 CG2R61 CG2R61 CG2R61 3.1000 2 180.00 ! PROT JES 8/25/89  
 CG2R61 CG2R61 CG2R61 CG3C50 3.1000 2 180.00 ! Molecu , from CG2R61 CG2R61 CG2R61 CG321,  
 PENALTY= 10  
 CG2R61 CG2R61 CG2R61 HGR61 4.2000 2 180.00 ! PROT JES 8/25/89 benzene  
 CG3C50 CG2R61 CG2R61 HGR61 2.4000 2 180.00 ! Molecu , from CG321 CG2R61 CG2R61 HGR61,  
 PENALTY= 10  
 HGR61 CG2R61 CG2R61 HGR61 2.4000 2 180.00 ! PROT JES 8/25/89 benzene  
 CG2R61 CG2R61 CG3C50 CG2R61 1.1493 2 180.00 ! viv 09/13 MP2/6-31G(d) scan fit  
 CG2R61 CG2R61 CG3C50 CG2R61 3.4435 3 180.00 ! viv 09/13 MP2/6-31G(d) scan fit  
 CG2R61 CG2R61 CG3C50 CG2R61 0.1241 4 0.00 ! viv 09/13 MP2/6-31G(d) scan fit  
 CG2R61 CG2R61 CG3C50 CG2R53 1.8520 2 180.0 ! viv 09/13 MP2/6-31G(d) scan fit  
 CG2R61 CG2R61 CG3C50 CG2R53 2.8876 3 0.00 ! viv 09/13 MP2/6-31G(d) scan fit  
 CG2R61 CG2R61 CG3C50 CG2R53 0.2424 4 0.00 ! viv 09/13 MP2/6-31G(d) scan fit  
 CG2R61 CG2R61 CG3C50 NG2R53 1.4433 2 180.0 ! viv 09/13 MP2/6-31G(d) scan fit  
 CG2R61 CG2R61 CG3C50 NG2R53 0.1841 3 0.00 ! viv 09/13 MP2/6-31G(d) scan fit  
 CG2R61 CG2R61 CG3C50 NG2R53 0.1644 4 0.00 ! viv 09/13 MP2/6-31G(d) scan fit  
 CG2R53 CG3C50 NG2R53 CG2R53 2.3100 3 180.00 ! Molecu , from CG3C52 CG3C52 NG2R53 CG2R53,  
 PENALTY= 84  
 CG2R53 CG3C50 NG2R53 HGP1 0.0000 3 0.00 ! viv 09/13  
 CG2R61 CG3C50 NG2R53 CG2R53 3.5000 3 180.00 ! viv 09/13  
 CG2R61 CG3C50 NG2R53 HGP1 0.1000 3 0.00 ! viv 09/13 introduced ~26 deg. puckering based  
 on QM

IMPROPERS

CG2R53 CG3C50 NG2R53 OG2D1 90.0000 0 0.00 ! Molecu , from CG2R53 CG3C52 NG2R53 OG2D1,  
 PENALTY= 1  
 CG2R53 NG2R53 NG2R53 OG2D1 90.0000 0 0.00 ! MHYO, 5-methylenehydantoin, xxwy from 2PDO  
 WILDCARD

NONBONDED nbxmod 5 atom cdiel fshift vatom vdistance vfswitch -  
 cutnb 14.0 ctofnb 12.0 ctonnb 10.0 eps 1.0 e14fac 1.0 wmin 1.5

!see mass list above for better description of atom types

HGP1 0.0 -0.0460 0.2245 ! polar H  
 HGR61 0.0 -0.0300 1.3582 ! benzene  
 CG2R53 0.0 -0.0200 2.2000 ! IMIA, imidazole; bulk solvent of 5 maybridge cmpds (kevo);  
 consistent with CG2R64  
 CG2R61 0.0 -0.0700 1.9924 ! INDO/TRP  
 CG3C50 0.0 -0.0360 2.0100 0.0 -0.01 1.9 ! extrapolation based on CG301, CG321 and  
 CG3C52, kevo  
 OG2D1 0.0 -0.1200 1.7000 0.0 -0.12 1.40 ! carbonyl. Also consistent with adm,  
 acetaldehyde, 11/08  
 NG2R53 0.0 -0.2000 1.8500 ! amide in 5-memebered ring (slightly pyramidized), 2PDO, kevo

END
